# Supplementary material for: Field-induced single-ion magnets exhibiting tri-axial anisotropy in a 1D Co(ii) coordination polymer with a rigid ligand 4,4′-(buta-1,3-diyne-1,4-diyl)dibenzoate
Source: Royal Society of Chemistry journal article supplement (doi:10.1039/d1dt01961a), 2021-01-01
Supplement: d1dt01961a1.pdf [file d1dt01961a1.pdf]

# Field-induced single-ion magnet performing tri-axial anisotropy in an 1D Co(II) coordination polymer with rigid linker ligand 4,4'-(buta-1,3-diyne-1,4-diyl)dibenzoate

*Catiúcia R. M. O. Matos,<sup>a</sup> Charlie V. Sarmiento,<sup>b</sup> Henrique C. Silva Jr,<sup>a</sup> Glaucio B. Ferreira,<sup>a</sup> Guilherme P. Guedes,<sup>a</sup> Wallace C. Nunes,<sup>b</sup> and Célia M. Ronconi<sup>\*,a</sup>*

*<sup>a</sup>Departamento de Química Inorgânica, Universidade Federal Fluminense (UFF), Outeiro de São João Batista, s/n, Campus do Valonguinho, Centro, 24020-141, Niterói, RJ, Brazil*

*<sup>b</sup>Instituto de Física, Universidade Federal Fluminense (UFF), Niterói-RJ, 24210-271, Brazil*

Corresponding authors: [cmronconi@id.uff.br](mailto:cmronconi@id.uff.br)

## Electronic Supporting Information

## Table of contents

|                                                                                                                                                                                                                                                                                                                                                                                                                                                                                                                                                                                                                                        |    |
|----------------------------------------------------------------------------------------------------------------------------------------------------------------------------------------------------------------------------------------------------------------------------------------------------------------------------------------------------------------------------------------------------------------------------------------------------------------------------------------------------------------------------------------------------------------------------------------------------------------------------------------|----|
| <b>Fig. S1.</b> ATR-FTIR spectra of the <b>H<sub>2</sub>L1</b> proligand and its intermediates <b>1, 2, 3</b> and <b>4</b> . .....                                                                                                                                                                                                                                                                                                                                                                                                                                                                                                     | 5  |
| <b>Fig. S2.</b> <sup>1</sup> H NMR spectrum of the intermediate <b>1</b> in CDCl <sub>3</sub> , at 298 K, in 500 MHz. ....                                                                                                                                                                                                                                                                                                                                                                                                                                                                                                             | 5  |
| <b>Fig. S3.</b> <sup>1</sup> H NMR spectrum of the intermediate <b>2</b> in CDCl <sub>3</sub> at 298 K, in 500 MHz. ....                                                                                                                                                                                                                                                                                                                                                                                                                                                                                                               | 6  |
| <b>Fig. S4.</b> <sup>1</sup> H NMR spectrum of the intermediate <b>3</b> in CDCl <sub>3</sub> at 298 K, in 500 MHz. ....                                                                                                                                                                                                                                                                                                                                                                                                                                                                                                               | 6  |
| <b>Fig. S5.</b> <sup>1</sup> H NMR spectrum of the intermediate <b>4</b> in CDCl <sub>3</sub> , at 298 K, in 500 MHz. ....                                                                                                                                                                                                                                                                                                                                                                                                                                                                                                             | 7  |
| <b>Fig. S6.</b> <sup>1</sup> H NMR spectrum of the <b>H<sub>2</sub>L1</b> proligand in DMSO-d <sub>6</sub> at 298 K, in 500 MHz. ....                                                                                                                                                                                                                                                                                                                                                                                                                                                                                                  | 7  |
| <b>Fig. S7.</b> <sup>13</sup> C NMR spectrum of the intermediate <b>1</b> in CDCl <sub>3</sub> , at 298 K, in 125 MHz. ....                                                                                                                                                                                                                                                                                                                                                                                                                                                                                                            | 8  |
| <b>Fig. S8.</b> <sup>13</sup> C NMR spectrum of the intermediate <b>2</b> in CDCl <sub>3</sub> , at 298 K, in 125 MHz. ....                                                                                                                                                                                                                                                                                                                                                                                                                                                                                                            | 8  |
| <b>Fig. S9.</b> <sup>13</sup> C NMR spectrum of the intermediate <b>3</b> in CDCl <sub>3</sub> , at 298 K, in 125 MHz. ....                                                                                                                                                                                                                                                                                                                                                                                                                                                                                                            | 9  |
| <b>Fig. S10.</b> <sup>13</sup> C NMR spectrum of the intermediate <b>4</b> in CDCl <sub>3</sub> , at 298 K, in 125 MHz. ....                                                                                                                                                                                                                                                                                                                                                                                                                                                                                                           | 9  |
| <b>Fig. S11.</b> (a) ATR-FTIR spectra with the main band assignments and (b) normalised UV-vis absorption spectra of the <b>H<sub>2</sub>L1</b> proligand and the <b>CoCP</b> . ....                                                                                                                                                                                                                                                                                                                                                                                                                                                   | 10 |
| <b>Table S1.</b> Assignments of the main ATR-FTIR bands of the <b>H<sub>2</sub>L1</b> and <b>CoCP</b> .....                                                                                                                                                                                                                                                                                                                                                                                                                                                                                                                            | 11 |
| <b>Table S2.</b> Crystal data and structure refinement for the <b>CoCP</b> and intermediate <b>4</b> .....                                                                                                                                                                                                                                                                                                                                                                                                                                                                                                                             | 12 |
| <b>Table S3.</b> Selected bond lengths (Å) in <b>CoCP</b> .....                                                                                                                                                                                                                                                                                                                                                                                                                                                                                                                                                                        | 13 |
| <b>Table S4.</b> Bond Angles (°) in <b>CoCP</b> .....                                                                                                                                                                                                                                                                                                                                                                                                                                                                                                                                                                                  | 13 |
| <b>Crystal structure analyses of the intermediate 4.</b> Suitable needle shaped single crystals of <b>4</b> were formed by slow evaporation in CH <sub>2</sub> Cl <sub>2</sub> at room temperature. <b>4</b> crystallised in the P <sup>1</sup> with one molecule comprising the asymmetric unit (Fig. S12). The structure of <b>4</b> is non-planar as shown by the torsion angle between one phenyl ring and the adjacent phenyl ring is 24.60°. The structure is stabilised by several supramolecular interactions including non-classical hydrogen bonds and π stacking such as: CH···O, CH···π and π···π listed in Fig. S12. .... | 13 |
| <b>Fig. S12.</b> (a) Asymmetric unit of <b>4</b> . Hydrogen atoms were hidden for the sake of clarity. Displacement ellipsoid parameters are drawn at the 50% probability level. Representation of hydrogen bonding (b) I (C13-H13···C9) and II (C5-H5···O4); (c) III (Cg···C1) and IV (Cg2···C8). .....                                                                                                                                                                                                                                                                                                                               | 14 |
| <b>Table S5.</b> Selected bond lengths (Å) in <b>4</b> .....                                                                                                                                                                                                                                                                                                                                                                                                                                                                                                                                                                           | 15 |
| <b>Table S6.</b> Selected bond angles (°) in <b>4</b> .....                                                                                                                                                                                                                                                                                                                                                                                                                                                                                                                                                                            | 16 |
| <b>Fig. S13.</b> Representation of the interactions (a) III, (b) IV and V in compound <b>CoCP</b> . ....                                                                                                                                                                                                                                                                                                                                                                                                                                                                                                                               | 17 |
| <b>Fig. S14.</b> Calculated PXRD generated from single crystal structure of the <b>CoCP</b> (Calc. <b>CoCP</b> ) compared with experimental data (Exp. <b>CoCP</b> ). ....                                                                                                                                                                                                                                                                                                                                                                                                                                                             | 18 |

|                                                                                                                                                                                                                                   |    |
|-----------------------------------------------------------------------------------------------------------------------------------------------------------------------------------------------------------------------------------|----|
| <b>Table S7.</b> Hydrogen bonds and short contacts in <b>CoCP</b> (distances are given in Å and angles in °).....                                                                                                                 | 18 |
| <b>Fig. S15.</b> Relative energies obtained for the <b>CoCP</b> compound: (blue) 3d orbitals; (orange) Kramers doublets; (green) transition energies. All energies are relative to the ground (0.0 cm <sup>-1</sup> ) energy..... | 19 |
| <b>Table S8.</b> Energy gap between the first 7 excited states and the ground state of compound <b>CoCP</b> .....                                                                                                                 | 20 |
| <b>Table S9.</b> First 12 eigenvalues of the Kramers doublets.....                                                                                                                                                                | 20 |
| <b>Table S10.</b> Description of the ground Kramers doublet .....                                                                                                                                                                 | 20 |
| <b>Fig. S16.</b> Magnetization results obtained for <b>CoCP</b> .The lines represent the fitted values obtained with PHI. ....                                                                                                    | 21 |
| <b>Table S11.</b> Selected magnetic results of hexacoordinated octahedral complexes with easy-axis anisotropy.....                                                                                                                | 22 |
| <b>Table S12.</b> Percentage composition of the eigenstates for <b>CoCP</b> . ....                                                                                                                                                | 23 |
| <b>Table S13.</b> G-tensors of the Kramer doublets for <b>CoCP</b> . ....                                                                                                                                                         | 24 |
| <b>Fig. S17.</b> Frequency-dependence of AC susceptibility for <b>CoCP</b> measured at zero DC field (lines are guides for the eyes).....                                                                                         | 24 |
| <b>Table S14.</b> Cole-Cole parameters obtained from fits of the frequency-dependence of $\chi^{AC}$ (measured at 450 Oe) using a Generalized Debye model and used to reproduce the Cole-Cole plots.....                          | 25 |
| <b>Fig. S18.</b> Frequency-dependence of AC susceptibility for <b>CoCP</b> measured at 450 Oe (lines represent the fits made using a generalized Debye model). ....                                                               | 26 |
| <b>Fig. S19.</b> Cole-Cole plot obtained from the frequency-dependence of $\chi^{AC}$ susceptibility for <b>CoCP</b> measured at 450 Oe (lines represent the fits made using a generalized Debye model). ....                     | 26 |
| <b>Table S15.</b> Cole-Cole parameters obtained from fits of the frequency-dependence of $\chi^{AC}$ (measured at 1kOe) using a Generalized Debye model.....                                                                      | 27 |
| <b>Table S16.</b> Cole-Cole parameters obtained from fits of the frequency-dependence of $\chi^{AC}$ (measured at 2kOe) using a Generalized Debye model and used to reproduce the Cole-Cole plots.....                            | 28 |
| <b>Fig. S20.</b> Frequency-dependence of AC susceptibility for <b>CoCP</b> measured at 2 kOe (lines represent the fits made using a generalized Debye model). ....                                                                | 29 |
| <b>Fig. S21.</b> Cole-Cole plot obtained from the frequency-dependence of $\chi^{AC}$ susceptibility for <b>CoCP</b> (measured at 2 kOe) (lines represent the fits made using a generalized Debye model). ...                     | 29 |
| <b>Table S17.</b> Cole-Cole parameters obtained from fits of the frequency-dependence of $\chi^{AC}$ (measured at 3 kOe) using a Generalized Debye model.....                                                                     | 30 |
| <b>Fig. S22.</b> Frequency-dependence of AC susceptibility for <b>CoCP</b> measured at 3 kOe (lines represent the fits made using a generalized Debye model). ....                                                                | 31 |
| <b>Fig. S23.</b> Cole-Cole plot obtained from the frequency-dependence of $\chi^{AC}$ susceptibility for <b>CoCP</b> (measured at 3 kOe) (lines represent the fits made by using a generalized Debye model). ....                 | 31 |

|                                                                                                                                                                                                               |    |
|---------------------------------------------------------------------------------------------------------------------------------------------------------------------------------------------------------------|----|
| <b>Table S18.</b> Cole-Cole parameters obtained from fits of the frequency-dependence of $\chi^{AC}$ (measured at 2.7 K) using a Generalized Debye model. ....                                                | 32 |
| <b>Fig. S24.</b> Frequency-dependence of AC susceptibility for <b>CoCP</b> measured at 2.7 K (lines represent the fits made using a generalized Debye model). ....                                            | 33 |
| <b>Fig. S25.</b> Cole-Cole plot obtained from the frequency-dependence of $\chi^{AC}$ susceptibility for <b>CoCP</b> (measured at 2.7 K) (lines represent the fits made using a generalized Debye model). ... | 33 |
| <b>Table S19.</b> Selected magnetic data of dynamic magnetic properties and structural correlations of hexacoordinated octahedral complexes.....                                                              | 34 |

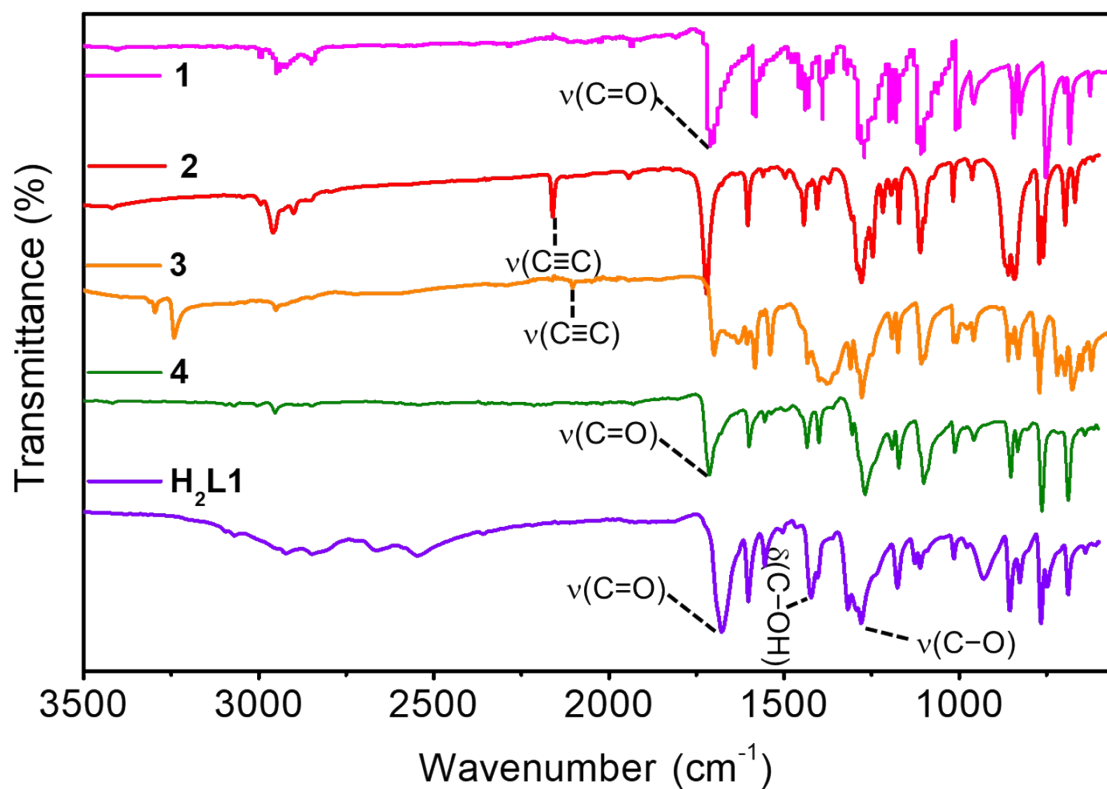

**Fig. S1.** ATR-FTIR spectra of the  $H_2L1$  proligand and its intermediates **1**, **2**, **3** and **4**.

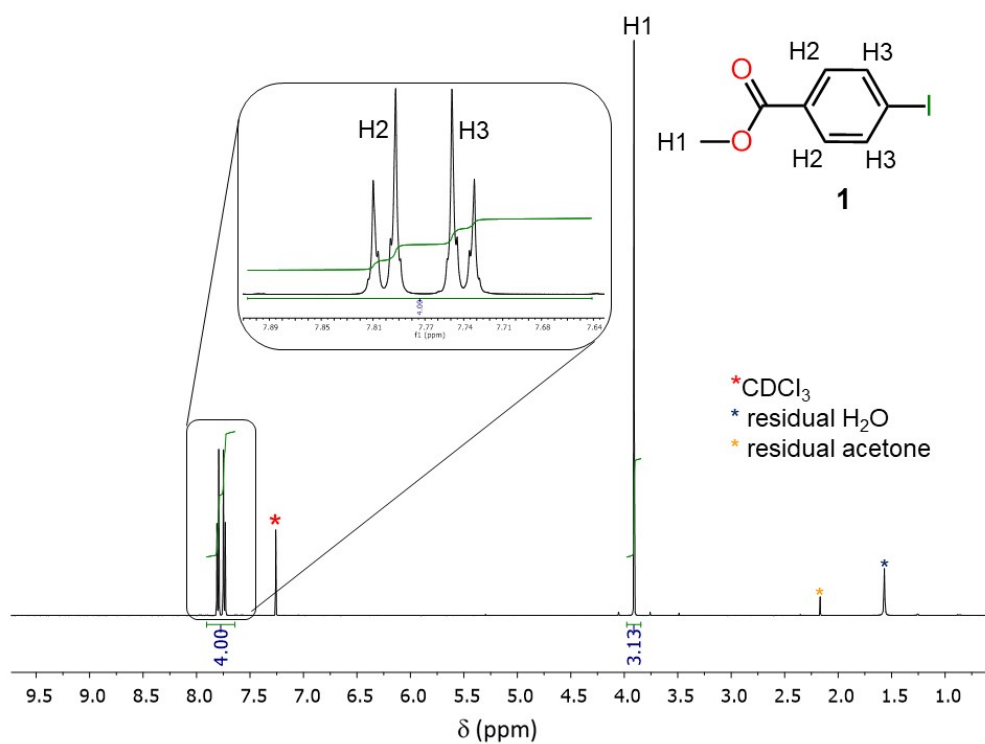

**Fig. S2.**  $^1H$  NMR spectrum of the intermediate **1** in  $CDCl_3$ , at 298 K, in 500 MHz.

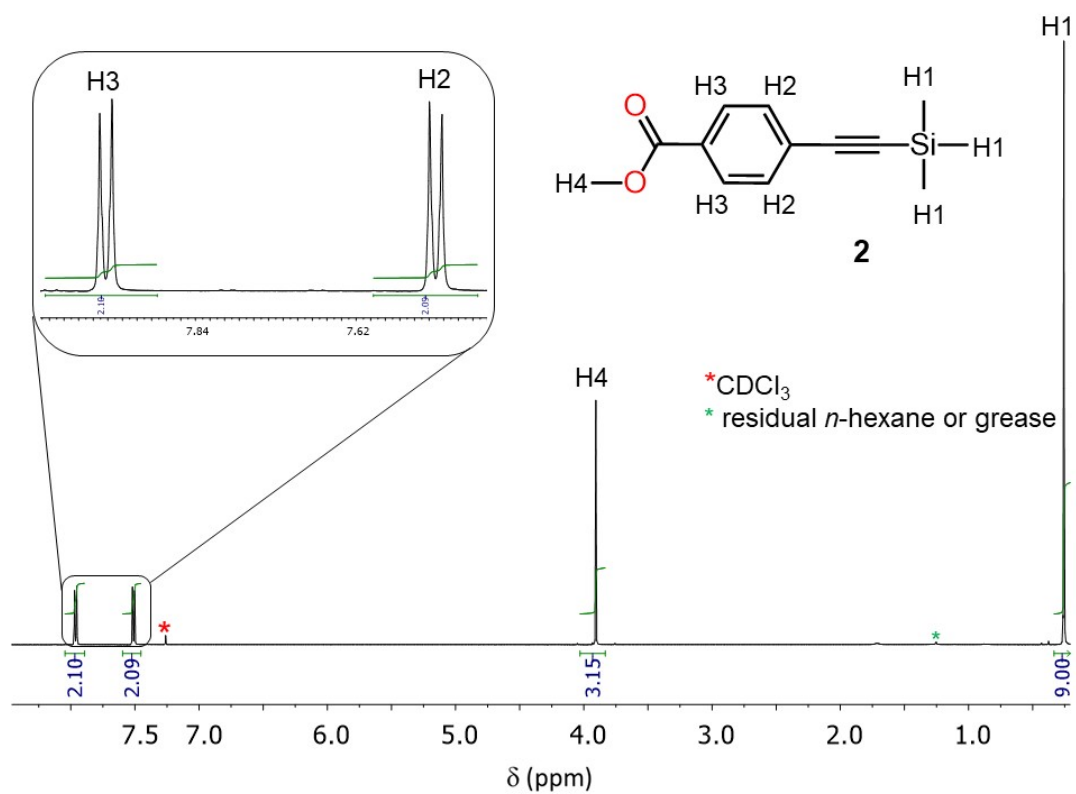

**Fig. S3.** <sup>1</sup>H NMR spectrum of the intermediate **2** in CDCl<sub>3</sub> at 298 K, in 500 MHz.

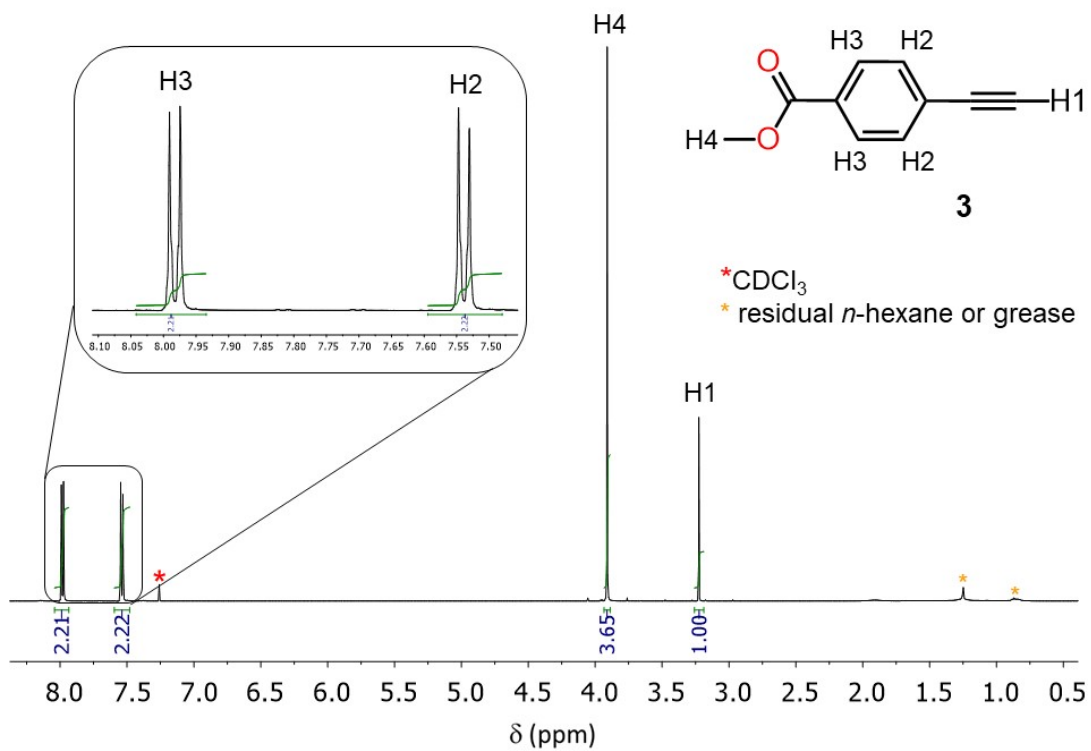

**Fig. S4.** <sup>1</sup>H NMR spectrum of the intermediate **3** in CDCl<sub>3</sub> at 298 K, in 500 MHz.

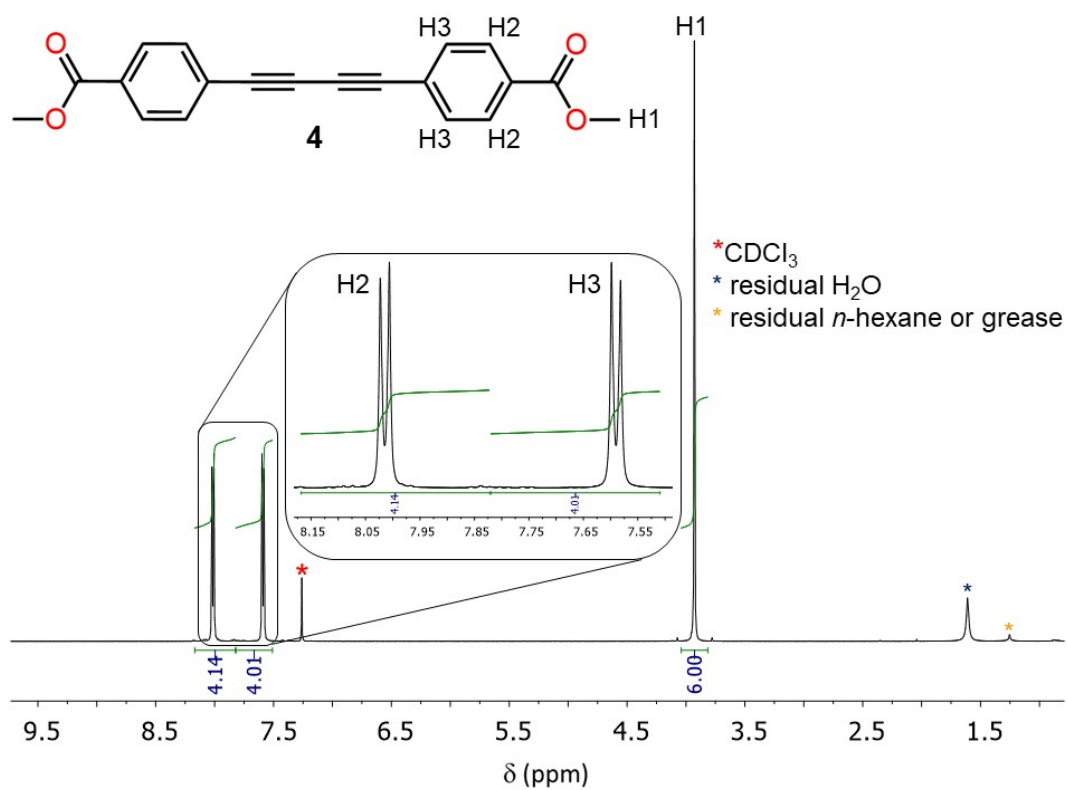

**Fig. S5.**  $^1\text{H}$  NMR spectrum of the intermediate **4** in  $\text{CDCl}_3$ , at 298 K, in 500 MHz.

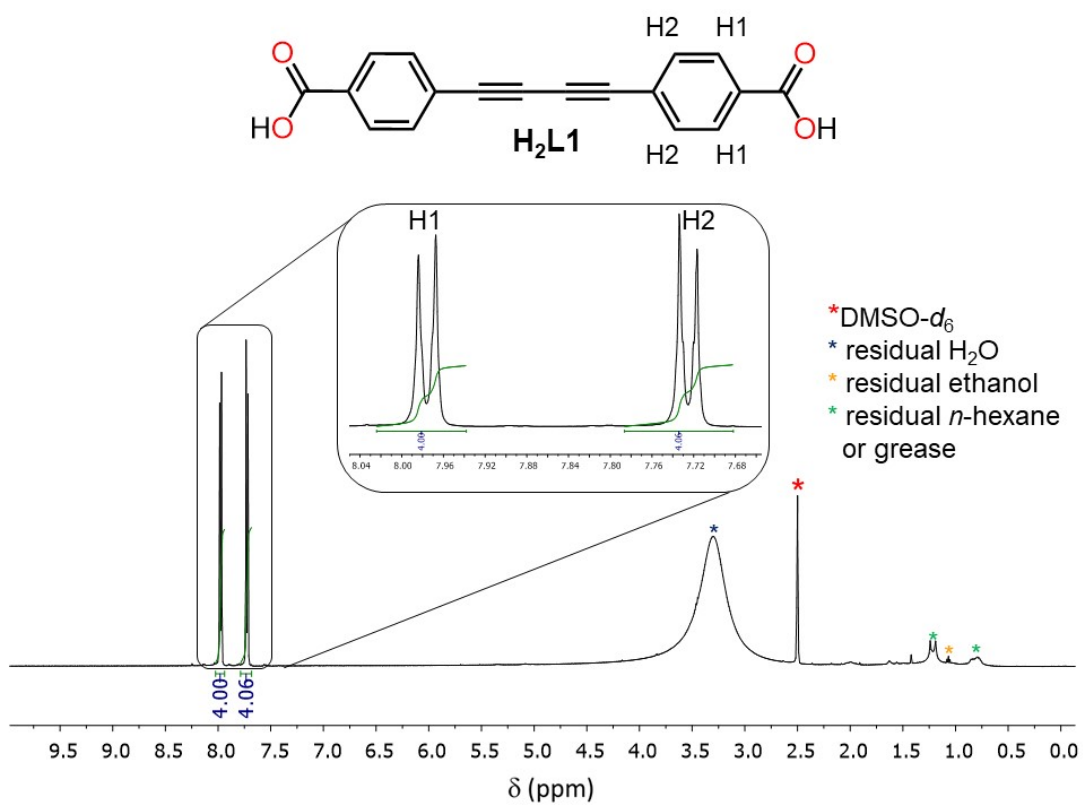

**Fig. S6.**  $^1\text{H}$  NMR spectrum of the  $\text{H}_2\text{L1}$  proligand in  $\text{DMSO-}d_6$  at 298 K, in 500 MHz.

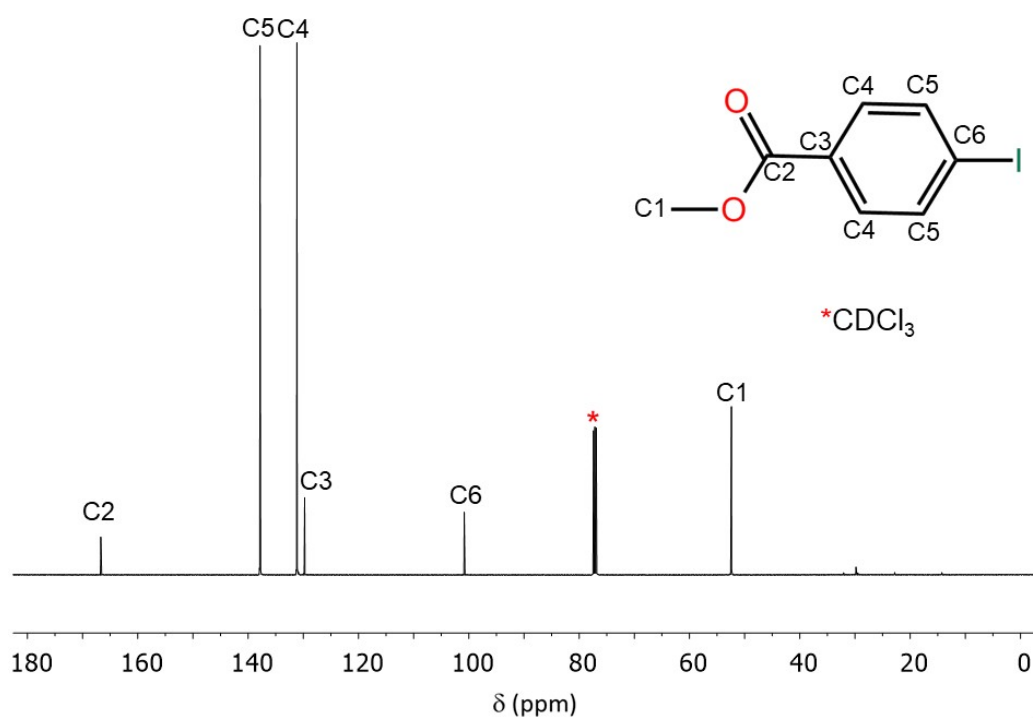

**Fig. S7.**  $^{13}\text{C}$  NMR spectrum of the intermediate **1** in  $\text{CDCl}_3$ , at 298 K, in 125 MHz.

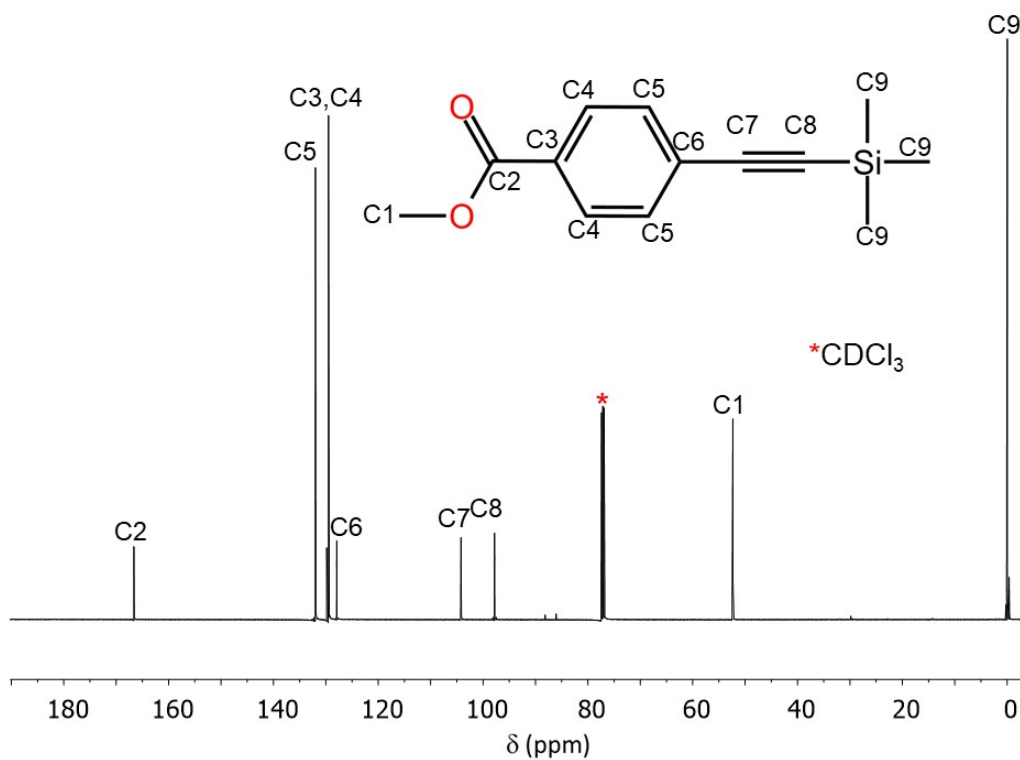

**Fig. S8.**  $^{13}\text{C}$  NMR spectrum of the intermediate **2** in  $\text{CDCl}_3$ , at 298 K, in 125 MHz.



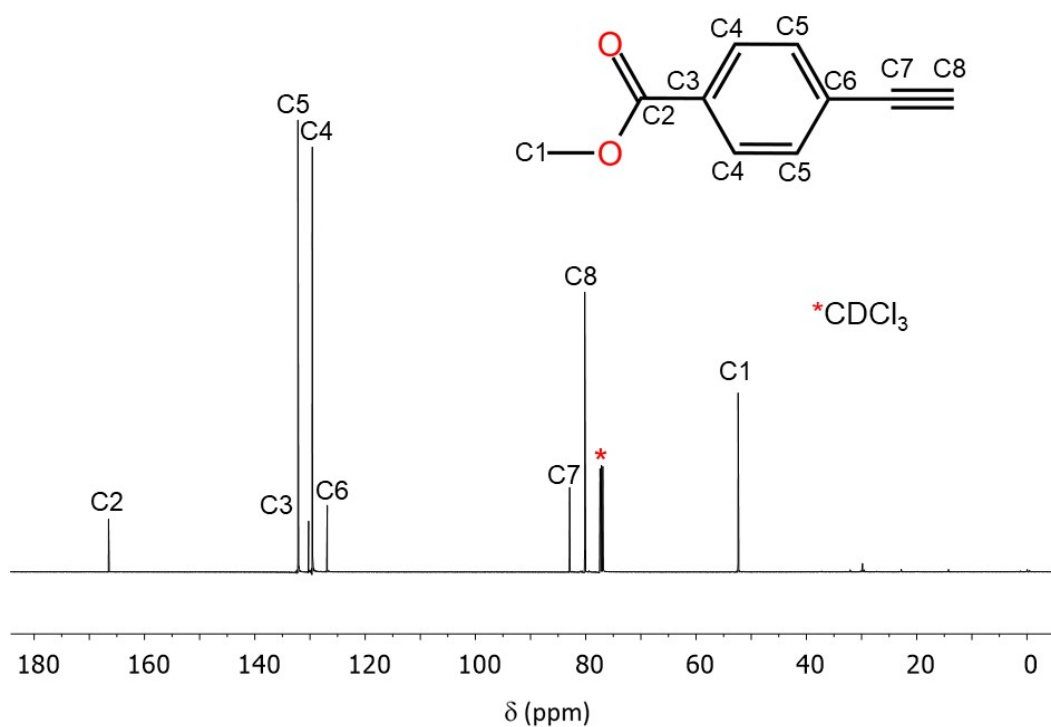

**Fig. S9.**  $^{13}\text{C}$  NMR spectrum of the intermediate **3** in  $\text{CDCl}_3$ , at 298 K, in 125 MHz.

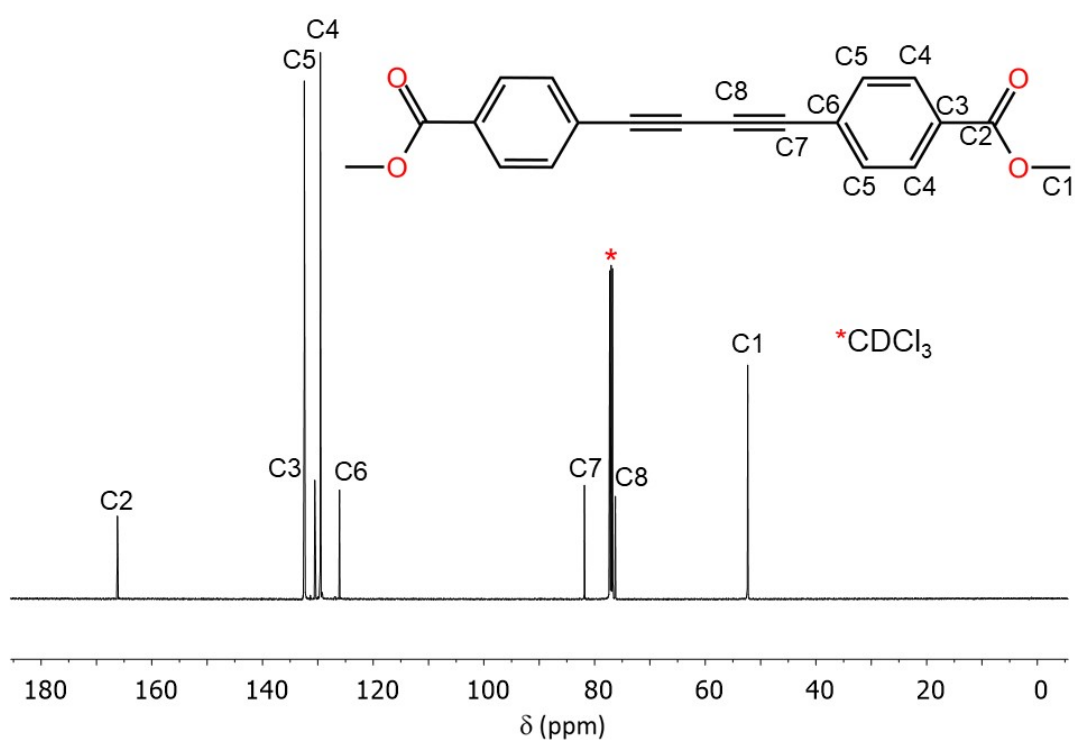

**Fig. S10.**  $^{13}\text{C}$  NMR spectrum of the intermediate **4** in  $\text{CDCl}_3$ , at 298 K, in 125 MHz.

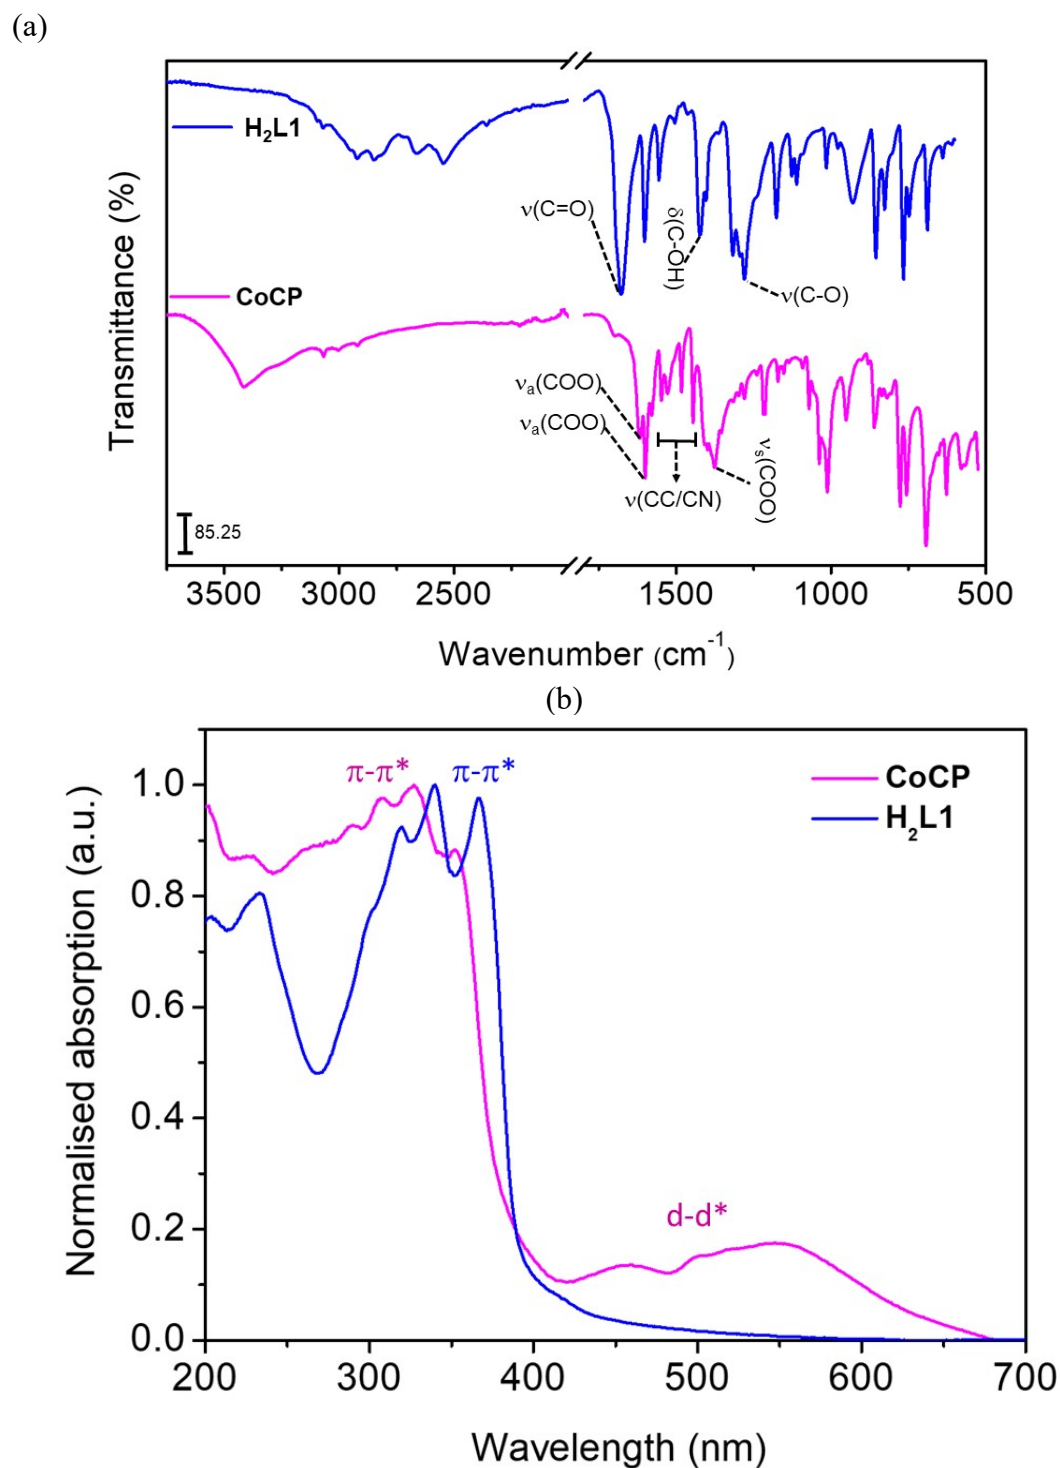

**Fig. S11.** (a) ATR-FTIR spectra with the main band assignments and (b) normalised UV-vis absorption spectra of the  $\text{H}_2\text{L1}$  proligand and the  $\text{CoCP}$ .

**Table S1.** Assignments of the main ATR-FTIR bands of the **H<sub>2</sub>L1** and **CoCP**

| <b>H<sub>2</sub>L1</b> | <b>CoCP</b>      | <b>Assignments</b>             |
|------------------------|------------------|--------------------------------|
| 1678                   | –                | $\nu(\text{C=O})$              |
| –                      | 1618 and<br>1600 | $\nu_{\text{a}}(\text{COO}^-)$ |
| –                      | 1579-1445        | $\nu(\text{CC/CN})$            |
| –                      | 1398 and<br>1375 | $\nu_{\text{s}}(\text{COO}^-)$ |
| 929                    | –                | $\delta(\text{O-H})$           |

**Table S2.** Crystal data and structure refinement for the **CoCP** and intermediate **4**

| Compounds                                      | <b>4</b>                                                                                                                                                                             | <b>CoCP</b>                                                                                                                                                   |
|------------------------------------------------|--------------------------------------------------------------------------------------------------------------------------------------------------------------------------------------|---------------------------------------------------------------------------------------------------------------------------------------------------------------|
| Empirical formula                              | C <sub>20</sub> H <sub>14</sub> O <sub>4</sub>                                                                                                                                       | C <sub>28</sub> H <sub>20</sub> CoN <sub>2</sub> O <sub>5</sub>                                                                                               |
| Formula weight                                 | 318.31                                                                                                                                                                               | 523.39                                                                                                                                                        |
| Temperature/K                                  | 298(2)                                                                                                                                                                               | 298(2)                                                                                                                                                        |
| Crystal system                                 | Triclinic                                                                                                                                                                            | Monoclinic                                                                                                                                                    |
| Space group                                    | $P\bar{1}$                                                                                                                                                                           | $P2_1/n$                                                                                                                                                      |
| Unit cell dimensions                           | $a = 7.0604(4) \text{ \AA}$<br>$b = 10.6647(7) \text{ \AA}$<br>$c = 11.8334(7) \text{ \AA}$<br>$\alpha = 75.773(3)^\circ$<br>$\beta = 73.159(2)^\circ$<br>$\gamma = 74.351(3)^\circ$ | $8.6551(3) \text{ \AA}$<br>$17.7754(5) \text{ \AA}$<br>$16.1528(5) \text{ \AA}$<br>$\alpha = 90^\circ$<br>$\beta = 103.4240(10)^\circ$<br>$\gamma = 90^\circ$ |
| Volume/ $\text{\AA}^3$                         | 807.50(9)                                                                                                                                                                            | 2417.18(13)                                                                                                                                                   |
| <i>Z</i>                                       | 2                                                                                                                                                                                    | 4                                                                                                                                                             |
| $\rho$ calc./g cm <sup>-3</sup>                | 1.3091                                                                                                                                                                               | 1.438                                                                                                                                                         |
| $\mu/\text{mm}^{-1}$                           | 0.091                                                                                                                                                                                | 0.752                                                                                                                                                         |
| <i>F</i> (000)                                 | 332.2                                                                                                                                                                                | 1076.0                                                                                                                                                        |
| Crystal size/mm <sup>-3</sup>                  | 0.280 x 0.254 x 0.164                                                                                                                                                                | 0.313 x 0.167 x 0.162                                                                                                                                         |
| Radiation                                      | Mo K $\alpha$ ( $\lambda = 0.71073$ )                                                                                                                                                | Mo K $\alpha$ ( $\lambda = 0.71073$ )                                                                                                                         |
| 2 $\Theta$ range for data collection/ $^\circ$ | 4.928 to 50.048 $^\circ$                                                                                                                                                             | 4.584 to 50.046 $^\circ$                                                                                                                                      |
| Reflections collected                          | 23446                                                                                                                                                                                | 28501                                                                                                                                                         |
| Index ranges                                   | $-8 \leq h \leq 8, -12 \leq k \leq 12,$<br>$-14 \leq l \leq 14$                                                                                                                      | $-10 \leq h \leq 10, -20 \leq k \leq 21, -19 \leq$<br>$l \leq 19$                                                                                             |
| Independent reflections                        | 2853 [ $R_{\text{int}} = 0.0438,$<br>$R_{\text{sigma}} = 0.0227$ ]                                                                                                                   | 4277 [ $R_{\text{int}} = 0.0334, R_{\text{sigma}} =$<br>$0.0198$ ]                                                                                            |
| Data/restraints/parameters                     | 2853/0/220                                                                                                                                                                           | 4277/1/328                                                                                                                                                    |
| Goof = S                                       | 1.112                                                                                                                                                                                | 1.036                                                                                                                                                         |
| Final <i>R</i> indexes [ $I \geq 2\sigma(I)$ ] | $R_1 = 0.0553, wR_2 = 0.1416$                                                                                                                                                        | $R_1 = 0.0281, wR_2 = 0.0651$                                                                                                                                 |
| Final <i>R</i> indexes [all data]              | $R_1 = 0.0735, wR_2 = 0.1583$                                                                                                                                                        | $R_1 = 0.0343, wR_2 = 0.0688$                                                                                                                                 |
| Largest diff. peak/hole / e $\text{\AA}^{-3}$  | 0.19/-0.20                                                                                                                                                                           | 0.34/-0.21                                                                                                                                                    |

**Table S3.** Selected bond lengths (Å) in **CoCP**

| <b>Bond length</b> |            |        |            |
|--------------------|------------|--------|------------|
| Co1-OW             | 2.0877(14) | Co1-N2 | 2.1600(16) |
| Co1-O1             | 2.0239(12) | Co1-O3 | 2.1165(12) |
| Co1-N1             | 2.1348(15) | Co1-O4 | 2.3650(13) |

**Table S4.** Bond Angles (°) in **CoCP**

| <b>Bond angles</b> |           |            |            |
|--------------------|-----------|------------|------------|
| OW-Co1-O3          | 90.68(6)  | N1-Co1-O4  | 148.82(5)  |
| OW-Co1-O4          | 87.85(5)  | N1-Co1-N2  | 94.39(6)   |
| OW-Co1-N1          | 87.83(6)  | N2-Co1-O4  | 91.72(5)   |
| OW-Co1-N2          | 176.36(6) | C18-O3-Co1 | 95.93(11)  |
| O3-Co1-O4          | 58.11(5)  | C18-O4-Co1 | 84.90(11)  |
| O3-Co1-N1          | 91.09(6)  | C1-O1-Co1  | 130.18(13) |
| O3-Co1-N2          | 92.16(6)  | C23-N1-Co1 | 119.57(13) |
| O1-Co1-OW          | 87.36(6)  | C19-N1-Co1 | 122.07(14) |
| O1-Co1-O3          | 177.39(6) | C24-N2-Co1 | 120.65(14) |
| O1-Co1-O4          | 120.04(5) | C28-N2-Co1 | 123.01(14) |
| O1-Co1-N1          | 90.57(6)  |            |            |
| O1-Co1-N2          | 89.73(6)  |            |            |

**Crystal structure analyses of the intermediate 4.** Suitable needle shaped single crystals of **4** were formed by slow evaporation in CH<sub>2</sub>Cl<sub>2</sub> at room temperature. **4** crystallised in the P $\bar{1}$  with one molecule comprising the asymmetric unit (Fig. S12). The structure of **4** is non-planar as shown by the torsion angle between one phenyl ring and the adjacent

phenyl ring is  $24.60^\circ$ . The structure is stabilised by several supramolecular interactions including non-classical hydrogen bonds and  $\pi$  stacking such as:  $\text{CH}\cdots\text{O}$ ,  $\text{CH}\cdots\pi$  and  $\pi\cdots\pi$  listed in Fig. S12.

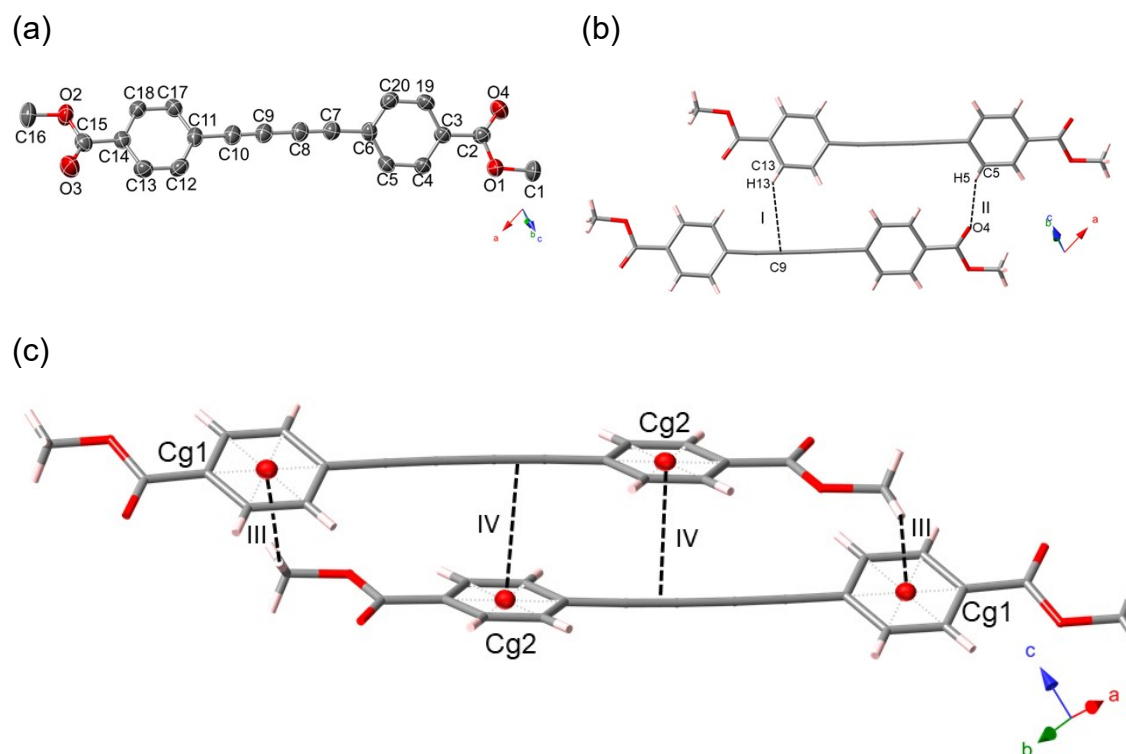

**Fig. S12.** (a) Asymmetric unit of **4**. Hydrogen atoms were hidden for the sake of clarity. Displacement ellipsoid parameters are drawn at the 50% probability level. Representation of hydrogen bonding (b) I (C13-H13 $\cdots$ C9) and II (C5-H5 $\cdots$ O4); (c) III (Cg $\cdots$ C1) and IV (Cg2 $\cdots$ C8).

Fig. S12-b represents some non-classical hydrogen bonds type  $\text{C-H}\cdots\text{O}$  and  $\text{C-H}\cdots\pi$  named I (C13-H13 $\cdots$ C9) and II (C5-H5 $\cdots$ O4) with donor $\cdots$ acceptor distances of 3.940(4) Å and 3.194(4) Å, respectively. Fig. S12-c shows  $\pi\cdots\pi$  stacking and  $\text{C-H}\cdots\pi$  interactions named III (Cg1 $\cdots$ C1) and IV (Cg2 $\cdots$ C8) with distances 3.82(2) Å and 3.52(1) Å, respectively. These intermolecular interactions govern the crystal packing of the intermediate **4**.

**Table S5.** Selected bond lengths (Å) in **4**

| <b>Bond length</b> |          |         |          |
|--------------------|----------|---------|----------|
| O1-C1              | 1.445(3) | C7-C8   | 1.201(3) |
| O1-C2              | 1.328(3) | C8-C9   | 1.368(3) |
| O2-C15             | 1.333(3) | C9-C10  | 1.204(3) |
| O2-C16             | 1.439(3) | C10-C11 | 1.428(3) |
| O3-C15             | 1.197(3) | C11-C12 | 1.390(3) |
| O4-C2              | 1.193(3) | C11-C17 | 1.392(3) |
| C2-C3              | 1.486(3) | C12-C13 | 1.377(3) |
| C3-C4              | 1.381(3) | C13-C14 | 1.387(3) |
| C3-C19             | 1.390(3) | C14-C15 | 1.486(3) |
| C4-C5              | 1.377(3) | C14-C18 | 1.382(3) |
| C5-C6              | 1.396(3) | C17-C18 | 1.383(3) |
| C6-C7              | 1.429(3) | C19-C20 | 1.376(3) |
| C6-C20             | 1.386(3) |         |          |

**Table S6.** Selected bond angles (°) in **4**

| <b>Bond angles</b> |            |             |          |
|--------------------|------------|-------------|----------|
| C2-O1-C1           | 116.73(19) | C9-C10-C11  | 178.8(3) |
| C15-O2-C16         | 115.9(2)   | C12-C11-C10 | 121.0(2) |
| O1-C2-C3           | 112.41(19) | C12-C11-C17 | 119.1(2) |
| O4-C2-O1           | 122.7(2)   | C17-C11-C10 | 119.9(2) |
| O4-C2-C3           | 124.9(2)   | C13-C12-C11 | 120.4(2) |
| C4-C3-C2           | 122.2(2)   | C12-C13-C14 | 120.4(2) |
| C4-C3-C19          | 119.3(2)   | C13-C14-C15 | 118.2(2) |
| C19-C3-C2          | 118.44(19) | C18-C14-C13 | 119.4(2) |
| C5-C4-C3           | 120.3(2)   | C18-C14-C15 | 122.3(2) |
| C4-C5-C6           | 120.5(2)   | O2-C15-C14  | 112.7(2) |
| C5-C6-C7           | 119.5(2)   | O3-C15-O2   | 123.0(2) |
| C20-C6-C5          | 118.9(2)   | O3-C15-C14  | 124.3(2) |
| C20-C6-C7          | 121.7(2)   | C18-C17-C11 | 120.1(2) |
| C8-C7-C6           | 176.5(3)   | C14-C18-C17 | 120.5(2) |
| C7-C8-C9           | 178.9(3)   | C20-C19-C3  | 120.5(2) |
| C10-C9-C8          | 178.7(3)   | C19-C20-C6  | 120.5(2) |



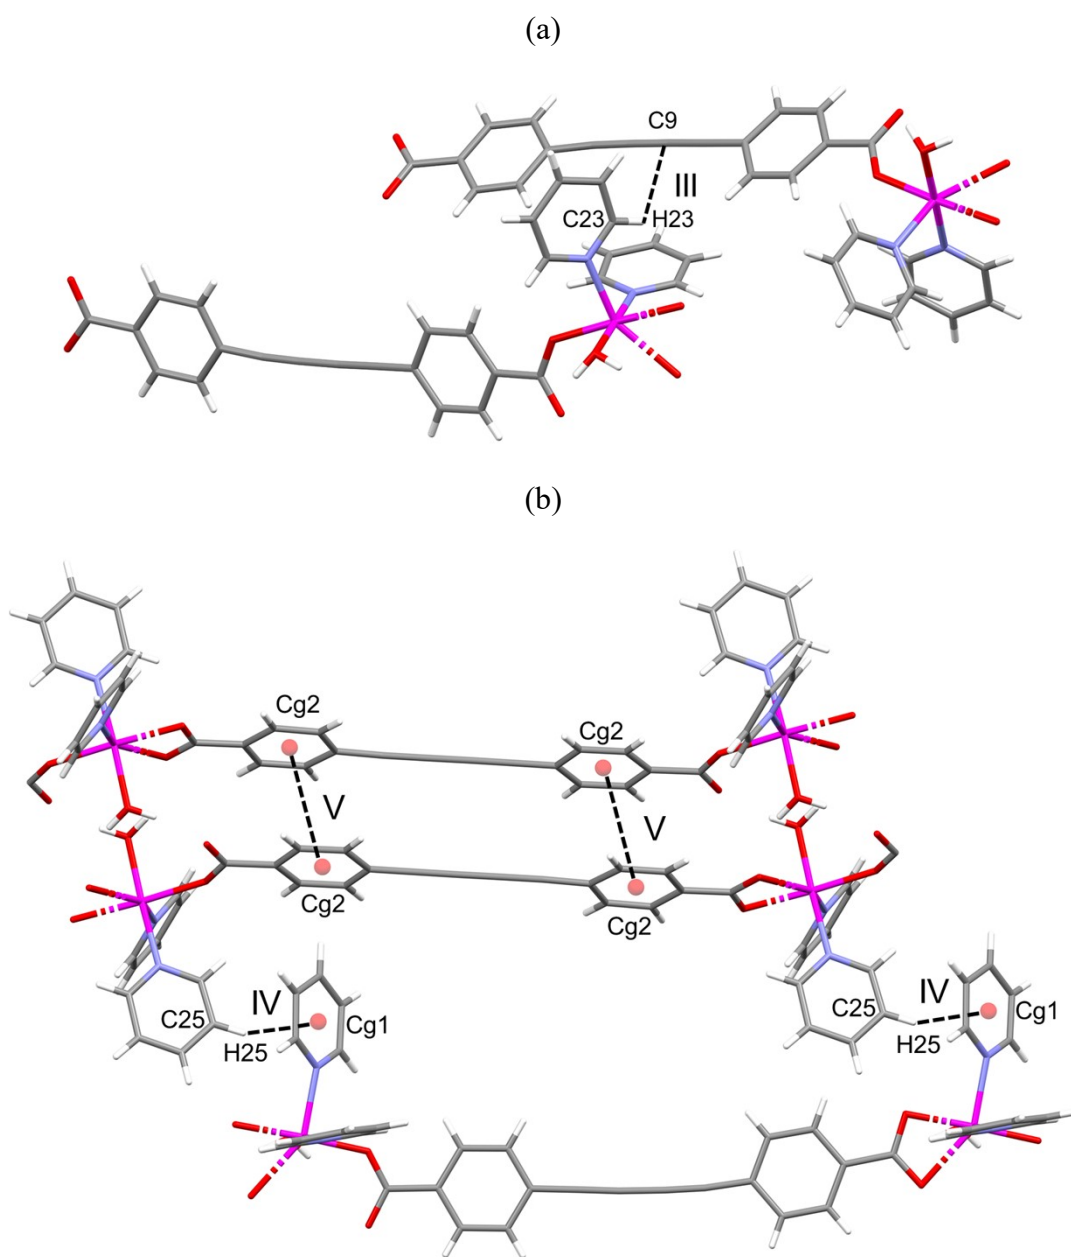

**Fig. S13.** Representation of the interactions (a) III, (b) IV and V in compound CoCP.

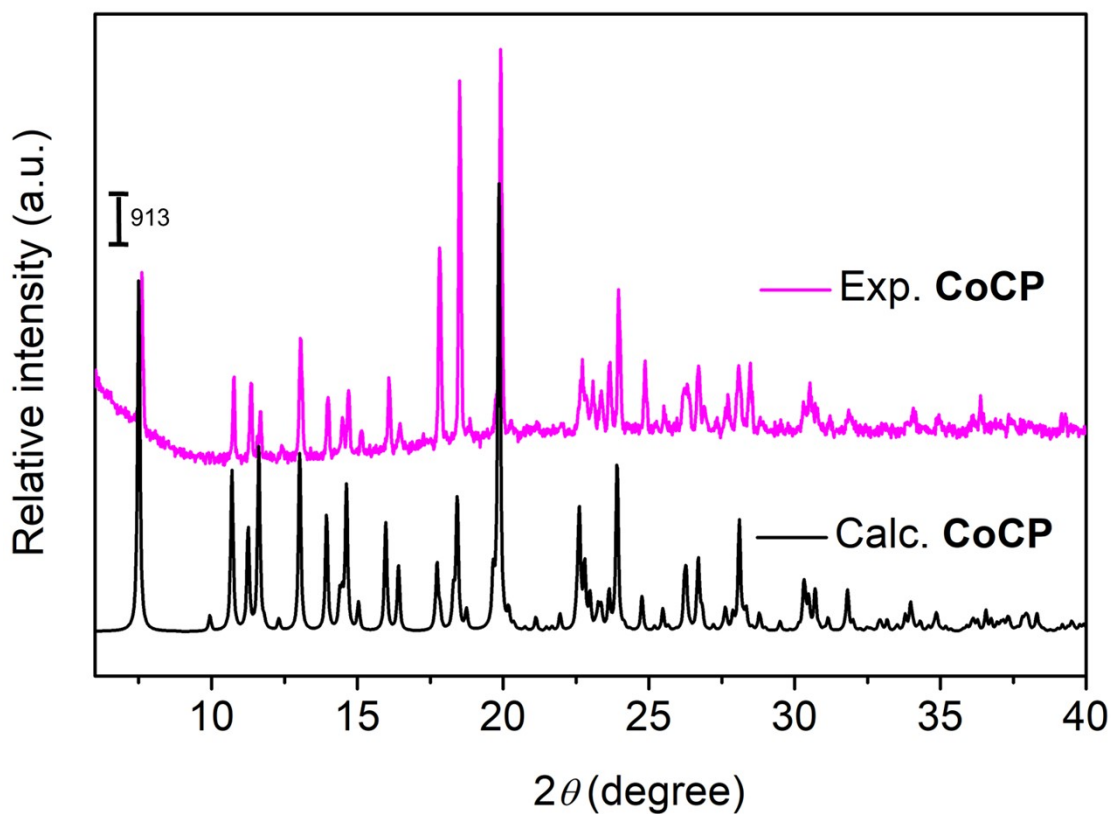

**Fig. S14.** Calculated PXRD generated from single crystal structure of the **CoCP** (Calc. **CoCP**) compared with experimental data (Exp. **CoCP**).

**Table S7.** Hydrogen bonds and short contacts in **CoCP** (distances are given in Å and angles in °).

| Interaction | d (D···H/A)   | d (D-H) <sup>a</sup> | d (H···A) <sup>b</sup> | d (D···A) <sup>c</sup> |
|-------------|---------------|----------------------|------------------------|------------------------|
| I           | OW-HWA···O4   | 0.80(3)              | 2.02(3)                | 2.774(2)               |
| II          | OW-HWB···O2   | 0.80(3)              | 1.83(3)                | 2.629(2)               |
| III         | C23-H23···C9  | -                    | -                      | 3.430(3)               |
| IV          | C25-H25···Cg1 | -                    | -                      | 3.57(1)                |
| V           | Cg2···Cg2     | -                    | -                      | 3.78(2)                |

<sup>a</sup> Distance between the donor atom and the hydrogen atom.

<sup>b</sup> Distance between the acceptor atom and the hydrogen atom.

<sup>c</sup> Distance between the donor atom and the acceptor atom for **I**, **II** and **III** or the distance between the donor atom and the centroid (Cg) for **IV** and **V**.

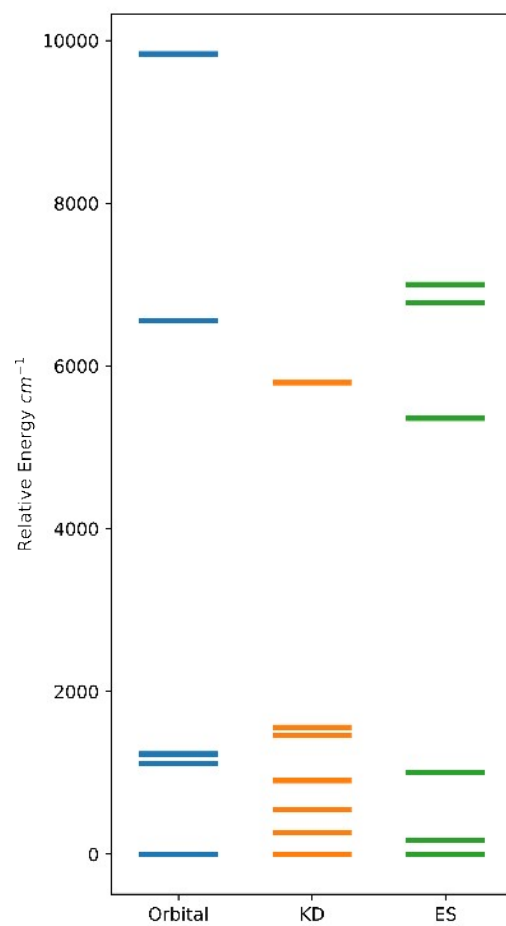

**Fig. S15.** Relative energies obtained for the **CoCP** compound: (blue) 3d orbitals; (orange) Kramers doublets; (green) transition energies. All energies are relative to the ground ( $0.0 \text{ cm}^{-1}$ ) energy.

**Table S8.** Energy gap between the first 7 excited states and the ground state of compound CoCP

| STATE | ROOT | MULT | DE/eV | DE/cm <sup>-1</sup> |
|-------|------|------|-------|---------------------|
| 1     | 1    | 4    | 0.024 | 195.5               |
| 2     | 2    | 4    | 0.16  | 1290.6              |
| 3     | 3    | 4    | 0.863 | 6958.9              |
| 4     | 4    | 4    | 1.082 | 8729                |
| 5     | 5    | 4    | 1.11  | 8953                |
| 6     | 0    | 2    | 1.228 | 9903.6              |
| 7     | 1    | 2    | 1.635 | 13189.5             |

**Table S9.** First 12 eigenvalues of the Kramers doublets

| Eigenvalues | cm <sup>-1</sup> | eV     |
|-------------|------------------|--------|
| 0           | 0                | 0      |
| 1           | 0                | 0      |
| 2           | 246.54           | 0.0306 |
| 3           | 246.54           | 0.0306 |
| 4           | 555.32           | 0.0689 |
| 5           | 555.32           | 0.0689 |
| 6           | 866.9            | 0.1075 |
| 7           | 866.9            | 0.1075 |
| 8           | 1700.25          | 0.2108 |
| 9           | 1700.25          | 0.2108 |
| 10          | 1777.96          | 0.2204 |
| 11          | 1777.96          | 0.2204 |
| 12          | 7344.9           | 0.9107 |

**Table S10.** Description of the ground Kramers doublet

| Eigenvector |        |       |      |      |      |
|-------------|--------|-------|------|------|------|
|             | Weight | Block | Root | Spin | Ms   |
| KD 0        | 0.559  | 0     | 0    | 3/2  | 3/2  |
|             | 0.360  | 0     | 1    | 3/2  | 3/2  |
|             | 0.035  | 0     | 2    | 3/2  | 1/2  |
|             | 0.020  | 0     | 0    | 3/2  | -1/2 |
|             | 0.013  | 0     | 1    | 3/2  | -1/2 |

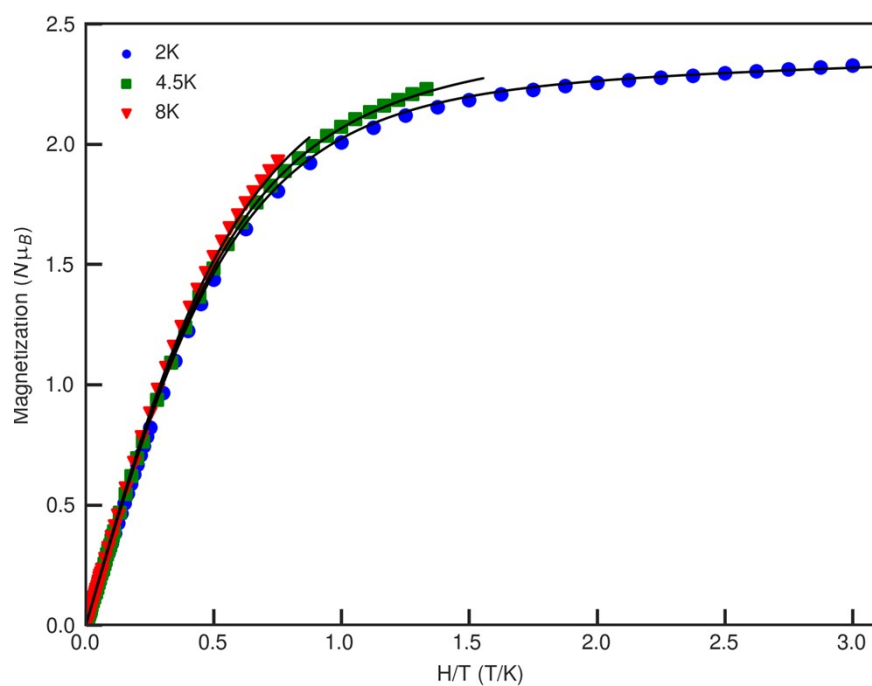

**Fig. S16.** Magnetization results obtained for CoCP. The lines represent the fitted values obtained with PHI.

**Table S11.** Selected magnetic results of hexacoordinated octahedral complexes with easy-axis anisotropy.

| Compound                                                                  | $\sigma$ | $\lambda / \text{cm}^{-1}$ | $\Delta_{\text{ax}}/\text{cm}^{-1}$ | $\Delta_{\text{rh}}/\text{cm}^{-1}$ | $zJ/\text{cm}^{-1}$ | Ab Initio | Ref       |
|---------------------------------------------------------------------------|----------|----------------------------|-------------------------------------|-------------------------------------|---------------------|-----------|-----------|
| <b>CoCP</b>                                                               | -1.5     | -146.8(4)                  | -1054(5)                            | -151.4(5)                           |                     | Yes       | This work |
| cis-[Co(hfac) <sub>2</sub> (H <sub>2</sub> O) <sub>2</sub> ]              | 1.34     | -147.2                     | -499.7                              | 136.3                               |                     | Yes       | 1         |
| [Co(dca) <sub>2</sub> (bim) <sub>4</sub> ]                                | -1.18    | -132.0                     | -416.3                              |                                     |                     | No        | 2         |
| [Co(dca) <sub>2</sub> (bim) <sub>2</sub> ] <sub>n</sub>                   | -1.16    | -134.1                     | -402.7                              |                                     |                     | No        | 2         |
| [Co(dca) <sub>2</sub> (bmim) <sub>2</sub> ] <sub>n</sub>                  | -1.24    | -134.0                     | -605.8                              |                                     |                     | No        | 2         |
| [Co(dca) <sub>2</sub> (atz) <sub>2</sub> ] <sub>n</sub>                   | -1.18(1) | -125(1)                    | -509(10)                            |                                     |                     | No        | 3         |
| [Co(ppad) <sub>2</sub> ] <sub>n</sub>                                     | -1.48(1) | -147(1)                    | -428(5)                             |                                     |                     | No        | 4         |
| [Co(AcO) <sub>2</sub> (py) <sub>2</sub> (H <sub>2</sub> O) <sub>2</sub> ] | -1.5     | -170                       | -279                                | 109                                 |                     | Yes       | 5         |
| [Co(pydm) <sub>2</sub> ](dnbz) <sub>2</sub>                               | -0.61    | -187                       | -585                                |                                     |                     | Yes       | 6         |
| (NBu <sub>4</sub> )[Co(piv) <sub>3</sub> ]                                | 1.33     | -170                       | -713.2                              | 66.3                                |                     | Yes       | 7         |

Abbreviations: hfac = hexafluoroacetylacetonate; dca = dicyanamide; bim = 1-benzylimidazole; bmim = 1-benzyl-2-methylimidazole; atz = 2-amino-1,3,5-triazine; ppad = N3-(3-pyridoyl)-3-pyridinecarboxamidrazone; AcO = acetate anion; py = pyridyl; pydm = 2,6-pyridinedimethanol; dnbz = 3,5-dinitrobenzoato(1-); ac = acetato; Melm = 1-methylimidazole; piv = pivalato

**Table S12.** Percentage composition of the eigenstates for **CoCP**.

| E/cm <sup>-1</sup> |                | 0.0   | 0.0   | 185.3 | 185.3 | 533.4 | 533.4 | 785.8 | 785.8 | 1551  | 1551  | 1607  | 1607  |
|--------------------|----------------|-------|-------|-------|-------|-------|-------|-------|-------|-------|-------|-------|-------|
| m <sub>S</sub>     | m <sub>L</sub> |       |       |       |       |       |       |       |       |       |       |       |       |
| -1.5               | -1.0           | 3.39  | 0.00  | 0.59  | 0.00  | 0.00  | 0.17  | 95.75 | -     | 0.00  | 0.00  | 0.09  | -     |
| -1.5               | 0.0            | -     | 0.02  | 0.00  | 0.80  | 5.89  | 0.12  | -     | 0.01  | 0.42  | 90.42 | -     | 2.32  |
| -1.5               | 1.0            | 84.44 | 0.00  | 8.45  | 0.00  | 0.01  | 0.36  | 3.72  | -     | 0.10  | 0.00  | 2.92  | -     |
| -0.5               | -1.0           | 0.00  | 0.64  | 0.01  | 18.46 | 72.59 | 1.43  | -     | 0.03  | 0.03  | 6.30  | -     | 0.51  |
| -0.5               | 0.0            | 4.91  | 0.00  | 1.97  | 0.00  | 0.03  | 1.46  | 0.31  | -     | 2.70  | 0.01  | 88.61 | -     |
| -0.5               | 1.0            | 0.00  | 6.60  | 0.03  | 69.70 | 17.59 | 0.35  | -     | 0.18  | 0.00  | 0.01  | -     | 5.54  |
| 0.5                | -1.0           | 6.60  | 0.00  | 69.70 | 0.03  | 0.35  | 17.59 | 0.18  | -     | 0.01  | 0.00  | 5.54  | -     |
| 0.5                | 0.0            | 0.00  | 4.91  | 0.00  | 1.97  | 1.46  | 0.03  | -     | 0.31  | 0.01  | 2.70  | -     | 88.61 |
| 0.5                | 1.0            | 0.64  | 0.00  | 18.46 | 0.01  | 1.43  | 72.59 | 0.03  | -     | 6.30  | 0.03  | 0.51  | -     |
| 1.5                | -1.0           | 0.00  | 84.44 | 0.00  | 8.45  | 0.36  | 0.01  | -     | 3.72  | 0.00  | 0.10  | -     | 2.92  |
| 1.5                | 0.0            | 0.02  | -     | 0.80  | 0.00  | 0.12  | 5.89  | 0.01  | -     | 90.42 | 0.42  | 2.32  | -     |
| 1.5                | 1.0            | 0.00  | 3.39  | 0.00  | 0.59  | 0.17  | 0.00  | -     | 95.75 | 0.00  | 0.00  | -     | 0.09  |

**Table S13.** G-tensors of the Kramer doublets for **CoCP**.

| $E/\text{cm}^{-1}$ | $g_x$ | $g_y$ | $g_z$ |
|--------------------|-------|-------|-------|
| 0.0                | 1.9   | 2.5   | 7.5   |
| 185.3              | 1.7   | 2.5   | 4.4   |
| 533.4              | 0.4   | 3.1   | 3.9   |
| 785.8              | 0.2   | 0.2   | 3.2   |
| 1551               | 0.7   | 0.9   | 5.3   |
| 1607               | 1.6   | 2.1   | 3.6   |

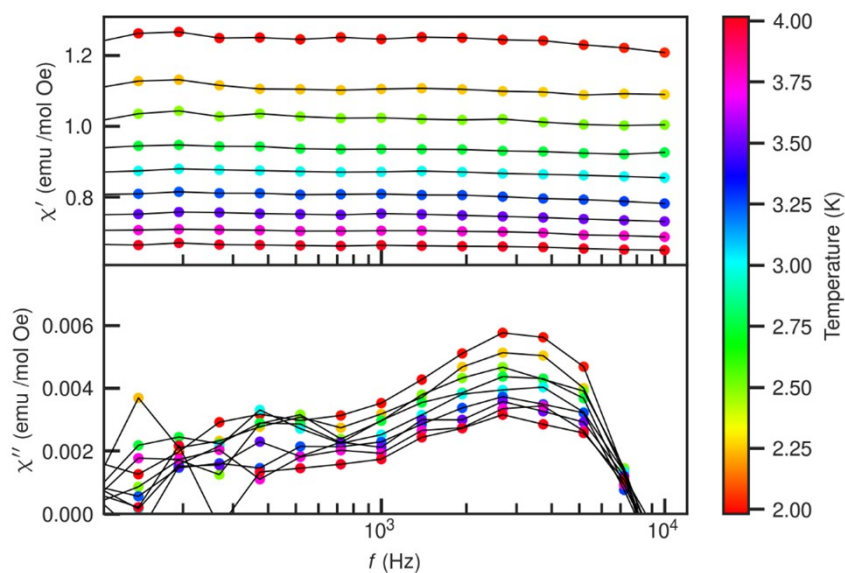

**Fig. S17.** Frequency-dependence of AC susceptibility for **CoCP** measured at zero DC field (lines are guides for the eyes).



**Table S14.** Cole-Cole parameters obtained from fits of the frequency-dependence of  $\chi_{AC}$  (measured at 450 Oe) using a Generalized Debye model and used to reproduce the Cole-Cole plots.

| Temperature (K) | $\chi_S$ (emu/K Oe) | $\chi_T$ (emu/K Oe) | $\alpha$ | $\tau$ (s)            |
|-----------------|---------------------|---------------------|----------|-----------------------|
| 2.75            | 0.52                | 0.65                | 0.12     | $2.81 \times 10^{-4}$ |
| 3.00            | 0.48                | 0.60                | 0.10     | $2.40 \times 10^{-4}$ |
| 3.25            | 0.44                | 0.56                | 0.11     | $1.88 \times 10^{-4}$ |
| 3.50            | 0.41                | 0.52                | 0.11     | $1.56 \times 10^{-4}$ |
| 3.75            | 0.39                | 0.49                | 0.08     | $1.27 \times 10^{-4}$ |
| 4.00            | 0.36                | 0.46                | 0.08     | $1.04 \times 10^{-4}$ |
| 4.25            | 0.34                | 0.44                | 0.07     | $8.41 \times 10^{-5}$ |
| 4.50            | 0.33                | 0.42                | 0.06     | $6.73 \times 10^{-5}$ |
| 4.75            | 0.31                | 0.39                | 0.06     | $5.35 \times 10^{-5}$ |
| 5.00            | 0.30                | 0.38                | 0.05     | $4.32 \times 10^{-5}$ |
| 5.50            | 0.27                | 0.34                | 0.04     | $2.70 \times 10^{-5}$ |

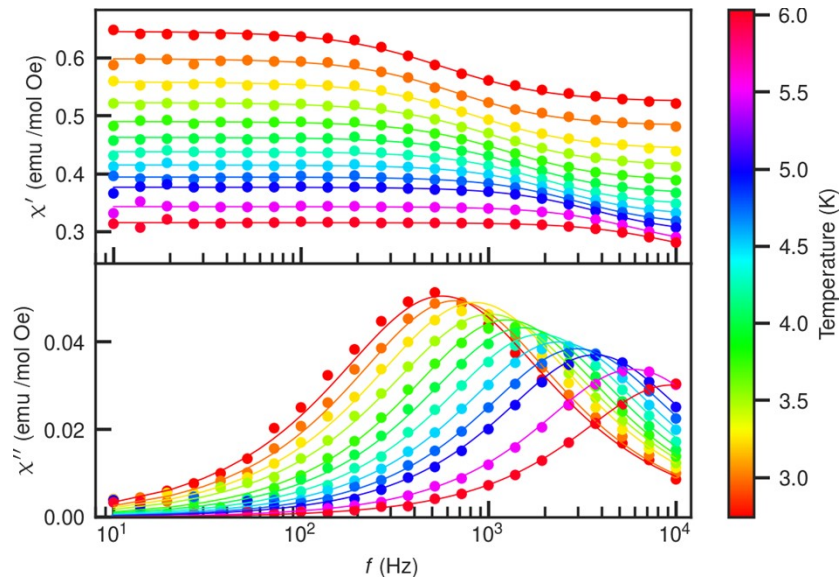

**Fig. S18.** Frequency-dependence of AC susceptibility for CoCP measured at 450 Oe (lines represent the fits made using a generalized Debye model).

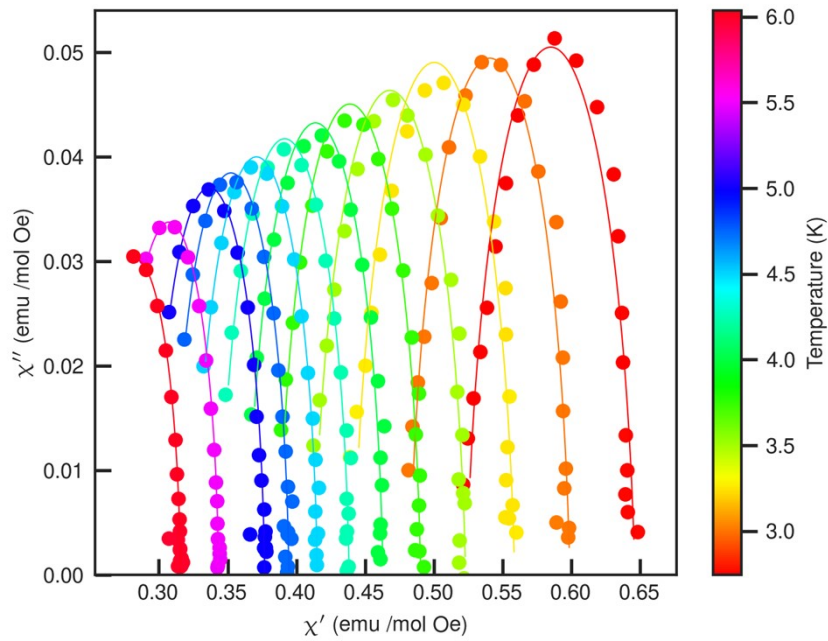

**Fig. S19.** Cole-Cole plot obtained from the frequency-dependence of  $\chi_{AC}$  susceptibility for CoCP measured at 450 Oe (lines represent the fits made using a generalized Debye model).

**Table S15.** Cole-Cole parameters obtained from fits of the frequency-dependence of  $\chi_{AC}$  (measured at 1kOe) using a Generalized Debye model.

| Temperature (K) | $\chi_S$ (emu/K Oe) | $\chi_T$ (emu/K Oe) | $\alpha$ | $\tau$ (s)            |
|-----------------|---------------------|---------------------|----------|-----------------------|
| 2.25            | 0.55                | 0.99                | 0.15     | $4.25 \times 10^{-4}$ |
| 2.50            | 0.50                | 0.94                | 0.13     | $3.83 \times 10^{-4}$ |
| 2.75            | 0.46                | 0.90                | 0.12     | $3.28 \times 10^{-4}$ |
| 3.00            | 0.41                | 0.85                | 0.11     | $2.70 \times 10^{-4}$ |
| 3.25            | 0.38                | 0.80                | 0.11     | $2.21 \times 10^{-4}$ |
| 3.50            | 0.36                | 0.76                | 0.10     | $1.87 \times 10^{-4}$ |
| 3.75            | 0.33                | 0.72                | 0.10     | $1.52 \times 10^{-4}$ |
| 4.00            | 0.31                | 0.68                | 0.09     | $1.22 \times 10^{-4}$ |
| 4.25            | 0.30                | 0.64                | 0.08     | $9.82 \times 10^{-5}$ |
| 4.50            | 0.28                | 0.61                | 0.08     | $7.82 \times 10^{-5}$ |
| 4.75            | 0.27                | 0.58                | 0.06     | $6.17 \times 10^{-5}$ |
| 5.00            | 0.25                | 0.55                | 0.06     | $4.82 \times 10^{-5}$ |
| 5.50            | 0.23                | 0.50                | 0.05     | $2.91 \times 10^{-5}$ |
| 6.00            | 0.21                | 0.46                | 0.04     | $1.79 \times 10^{-5}$ |

**Table S16.** Cole-Cole parameters obtained from fits of the frequency-dependence of  $\chi_{AC}$  (measured at 2kOe) using a Generalized Debye model and used to reproduce the Cole-Cole plots.

| T (K) | $\chi_{S,T}$<br>(emu/K) | $\Delta\chi_{\tau_1}$<br>(emu/K) | $\tau_1$ (s)          | $\alpha_1$ | $\Delta\chi_{\tau_2}$<br>(emu/K) | $\tau_2$ (s) | $\alpha_2$ |
|-------|-------------------------|----------------------------------|-----------------------|------------|----------------------------------|--------------|------------|
| 2.0   | 0.196                   | 0.285                            | $3.08 \times 10^{-4}$ | 0.175      | 0.822                            | 0.40         | 0.54       |
| 2.2   | 0.179                   | 0.313                            | $2.96 \times 10^{-4}$ | 0.152      | 0.556                            | 0.21         | 0.55       |
| 2.4   | 0.164                   | 0.352                            | $2.86 \times 10^{-4}$ | 0.149      | 0.730                            | 1.15         | 0.57       |
| 2.6   | 0.153                   | 0.386                            | $2.68 \times 10^{-4}$ | 0.149      | 0.707                            | 1.65         | 0.51       |
| 2.8   | 0.142                   | 0.398                            | $2.45 \times 10^{-4}$ | 0.141      | 0.559                            | 3.11         | 0.55       |
| 3.0   | 0.133                   | 0.413                            | $2.23 \times 10^{-4}$ | 0.146      | 0.816                            | 4.24         | 0.37       |
| 3.2   | 0.125                   | 0.411                            | $1.98 \times 10^{-4}$ | 0.140      | -                                | -            | -          |
| 3.4   | 0.118                   | 0.406                            | $1.74 \times 10^{-4}$ | 0.137      | -                                | -            | -          |
| 3.6   | 0.112                   | 0.396                            | $1.51 \times 10^{-4}$ | 0.132      | -                                | -            | -          |
| 3.8   | 0.107                   | 0.383                            | $1.30 \times 10^{-4}$ | 0.124      | -                                | -            | -          |
| 4.0   | 0.103                   | 0.368                            | $1.12 \times 10^{-4}$ | 0.112      | -                                | -            | -          |
| 4.5   | 0.095                   | 0.335                            | $0.74 \times 10^{-4}$ | 0.091      | -                                | -            | -          |
| 5     | 0.089                   | 0.304                            | $0.48 \times 10^{-4}$ | 0.065      | -                                | -            | -          |
| 5.5   | 0.083                   | 0.279                            | $0.30 \times 10^{-4}$ | 0.049      | -                                | -            | -          |
| 6     | 0.078                   | 0.256                            | $0.19 \times 10^{-4}$ | 0.0372     | -                                | -            | -          |

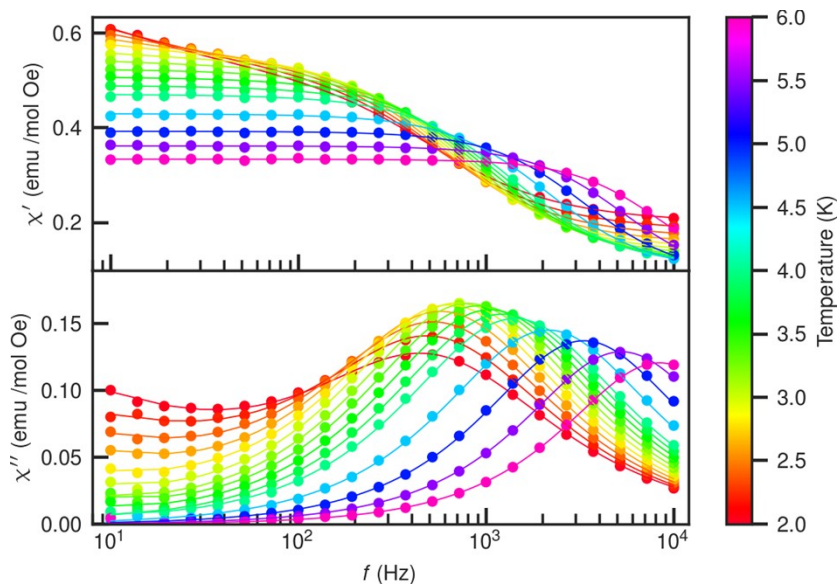

**Fig. S20.** Frequency-dependence of AC susceptibility for **CoCP** measured at 2 kOe (lines represent the fits made using a generalized Debye model).

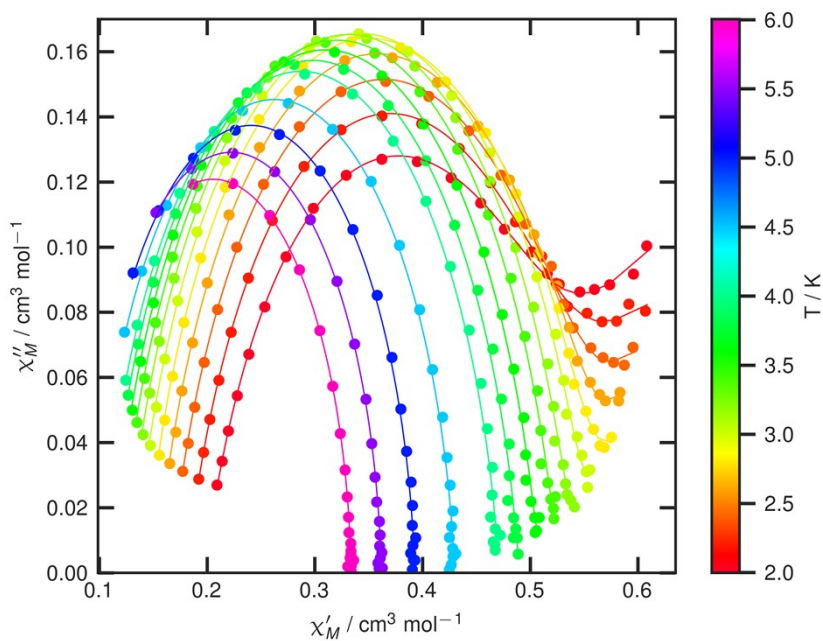

**Fig. S21.** Cole-Cole plot obtained from the frequency-dependence of  $\chi_{AC}$  susceptibility for **CoCP** (measured at 2 kOe) (lines represent the fits made using a generalized Debye model).

**Table S17.** Cole-Cole parameters obtained from fits of the frequency-dependence of  $\chi_{AC}$  (measured at 3 kOe) using a Generalized Debye model.

| T (K) | $\chi_{s,T}$<br>(emu/K) | $\Delta\chi_{T1}$<br>(emu/K) | $\tau_1$ (s)          | $\alpha_1$ | $\Delta\chi_{T2}$<br>(emu/K) | $\tau_2$ (s) | $\alpha_2$ |
|-------|-------------------------|------------------------------|-----------------------|------------|------------------------------|--------------|------------|
| 2.0   | 0.092                   | 0.242                        | $1.65 \times 10^{-4}$ | 0.238      | 0.39                         | 0.05         | 0.33       |
| 2.2   | 0.083                   | 0.237                        | $1.63 \times 10^{-4}$ | 0.173      | 4.34                         | 57.9         | 0.60       |
| 2.4   | 0.075                   | 0.267                        | $1.69 \times 10^{-4}$ | 0.151      | 3.59                         | 88.3         | 0.63       |
| 2.6   | 0.072                   | 0.319                        | $1.76 \times 10^{-4}$ | 0.158      | 5.39                         | 162.8        | 0.57       |
| 2.8   | 0.068                   | 0.350                        | $1.73 \times 10^{-4}$ | 0.151      | 5.61                         | 200.3        | 0.55       |
| 3.0   | 0.065                   | 0.376                        | $1.67 \times 10^{-4}$ | 0.148      | 6.06                         | 260.1        | 0.52       |
| 3.2   | 0.061                   | 0.394                        | $1.57 \times 10^{-4}$ | 0.147      | -                            | -            | -          |
| 3.4   | 0.058                   | 0.402                        | $1.44 \times 10^{-4}$ | 0.144      | -                            | -            | -          |
| 3.6   | 0.055                   | 0.405                        | $1.31 \times 10^{-4}$ | 0.140      | -                            | -            | -          |
| 3.8   | 0.052                   | 0.400                        | $1.16 \times 10^{-4}$ | 0.135      | -                            | -            | -          |
| 4.0   | 0.051                   | 0.391                        | $1.02 \times 10^{-4}$ | 0.125      | -                            | -            | -          |
| 4.5   | 0.048                   | 0.364                        | $0.70 \times 10^{-4}$ | 0.102      | -                            | -            | -          |
| 5     | 0.047                   | 0.335                        | $0.46 \times 10^{-4}$ | 0.077      | -                            | -            | -          |
| 5.5   | 0.045                   | 0.309                        | $0.30 \times 10^{-4}$ | 0.056      | -                            | -            | -          |
| 6     | 0.042                   | 0.285                        | $0.19 \times 10^{-4}$ | 0.044      | -                            | -            | -          |

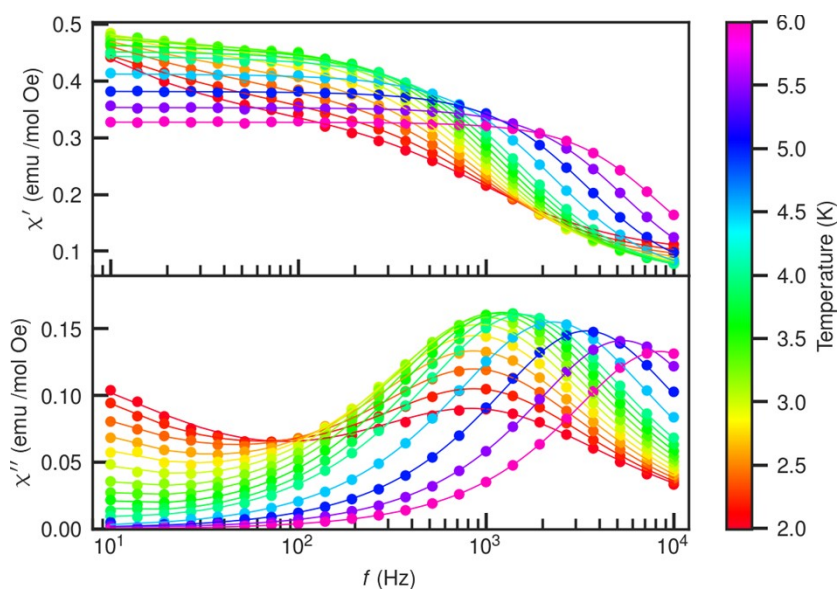

**Fig. S22.** Frequency-dependence of AC susceptibility for CoCP measured at 3 kOe (lines represent the fits made using a generalized Debye model).

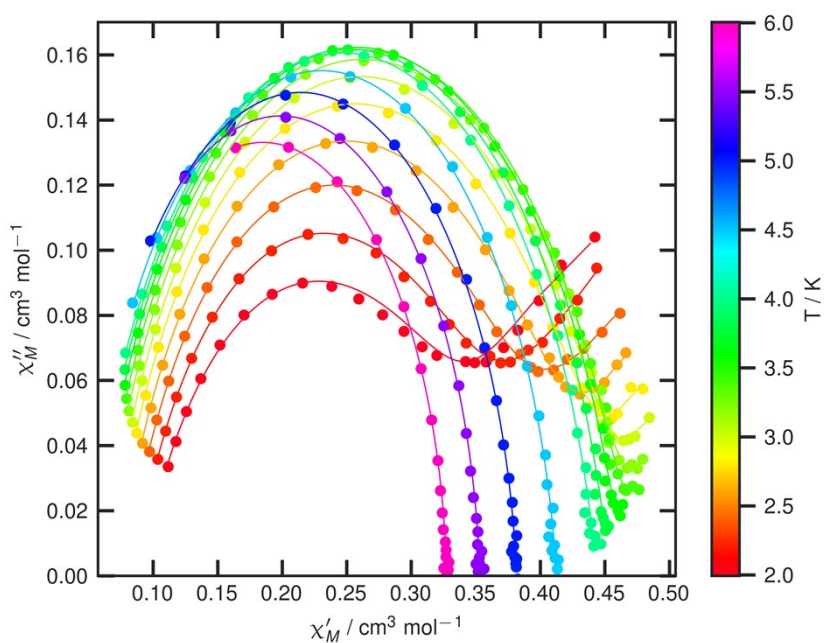

**Fig. S23.** Cole-Cole plot obtained from the frequency-dependence of  $\chi_{AC}$  susceptibility for CoCP (measured at 3 kOe) (lines represent the fits made by using a generalized Debye model).

**Table S18.** Cole-Cole parameters obtained from fits of the frequency-dependence of  $\chi_{AC}$  (measured at 2.7 K) using a Generalized Debye model.

| H (Oe) | $\chi_{s,T}$<br>(emu/K) | $\Delta\chi_{T1}$<br>(emu/K) | $\tau_1$ (s)          | $\alpha_1$ | $\Delta\chi_{T2}$<br>(emu/K) | $\tau_2$ (s) | $\alpha_2$ |
|--------|-------------------------|------------------------------|-----------------------|------------|------------------------------|--------------|------------|
| 350    | 0.61                    | 0.09                         | $2.83 \times 10^{-4}$ | 0.18       | -                            | -            | -          |
| 450    | 0.52                    | 0.65                         | $2.81 \times 10^{-4}$ | 0.12       | -                            | -            | -          |
| 550    | 0.52                    | 0.17                         | $3.09 \times 10^{-4}$ | 0.12       | -                            | -            | -          |
| 750    | 0.44                    | 0.24                         | $3.24 \times 10^{-4}$ | 0.12       | -                            | -            | -          |
| 1000   | 0.31                    | 0.62                         | $3.28 \times 10^{-4}$ | 0.12       | -                            | -            | -          |
| 1100   | 0.31                    | 0.34                         | $3.27 \times 10^{-4}$ | 0.13       | -                            | -            | -          |
| 1200   | 0.29                    | 0.36                         | $3.26 \times 10^{-4}$ | 0.13       | -                            | -            | -          |
| 1300   | 0.26                    | 0.37                         | $3.23 \times 10^{-4}$ | 0.13       | -                            | -            | -          |
| 1400   | 0.24                    | 0.39                         | $3.20 \times 10^{-4}$ | 0.14       | -                            | -            | -          |
| 1500   | 0.22                    | 0.40                         | $3.16 \times 10^{-4}$ | 0.14       | -                            | -            | -          |
| 1600   | 0.20                    | 0.40                         | $3.01 \times 10^{-4}$ | 0.13       | 0.13                         | 0.13         | 0.25       |
| 1700   | 0.18                    | 0.40                         | $2.93 \times 10^{-4}$ | 0.13       | 9.35                         | 49.46        | 0.27       |
| 1800   | 0.17                    | 0.39                         | $2.85 \times 10^{-4}$ | 0.13       | 2.88                         | 126.34       | 0.51       |
| 1900   | 0.16                    | 0.40                         | $2.80 \times 10^{-4}$ | 0.13       | 5.99                         | 48.16        | 0.34       |
| 2000   | 0.14                    | 0.40                         | $2.69 \times 10^{-4}$ | 0.13       | 5.66                         | 65.38        | 0.39       |
| 2200   | 0.12                    | 0.40                         | $2.54 \times 10^{-4}$ | 0.14       | 8.48                         | 55.25        | 0.33       |
| 2400   | 0.11                    | 0.39                         | $2.38 \times 10^{-4}$ | 0.14       | 6.52                         | 69.55        | 0.39       |
| 2600   | 0.09                    | 0.37                         | $2.17 \times 10^{-4}$ | 0.14       | 8.09                         | 100.90       | 0.42       |
| 2800   | 0.08                    | 0.36                         | $2.00 \times 10^{-4}$ | 0.15       | 9.31                         | 135.11       | 0.42       |
| 3000   | 0.07                    | 0.35                         | $1.82 \times 10^{-4}$ | 0.14       | 11.02                        | 166.10       | 0.43       |
| 3200   | 0.06                    | 0.34                         | $1.67 \times 10^{-4}$ | 0.15       | 16.24                        | 155.81       | 0.38       |
| 3400   | 0.05                    | 0.32                         | $1.49 \times 10^{-4}$ | 0.14       | 20.75                        | 597.11       | 0.45       |
| 3600   | 0.05                    | 0.31                         | $1.35 \times 10^{-4}$ | 0.15       | 20.61                        | 211.87       | 0.39       |
| 3800   | 0.04                    | 0.29                         | $1.21 \times 10^{-4}$ | 0.14       | 14.09                        | 341.10       | 0.46       |
| 4000   | 0.04                    | 0.28                         | $1.11 \times 10^{-4}$ | 0.14       | 18.20                        | 321.97       | 0.43       |
| 4200   | 0.03                    | 0.27                         | $1.01 \times 10^{-4}$ | 0.14       | 24.92                        | 311.93       | 0.39       |
| 4400   | 0.03                    | 0.25                         | $9.09 \times 10^{-5}$ | 0.12       | 12.05                        | 516.65       | 0.50       |
| 4600   | 0.03                    | 0.24                         | $8.28 \times 10^{-5}$ | 0.13       | 16.75                        | 347.63       | 0.44       |
| 4800   | 0.03                    | 0.22                         | $7.50 \times 10^{-5}$ | 0.12       | 16.02                        | 608.18       | 0.48       |
| 5000   | 0.02                    | 0.22                         | $6.83 \times 10^{-5}$ | 0.13       | 24.92                        | 671.52       | 0.43       |



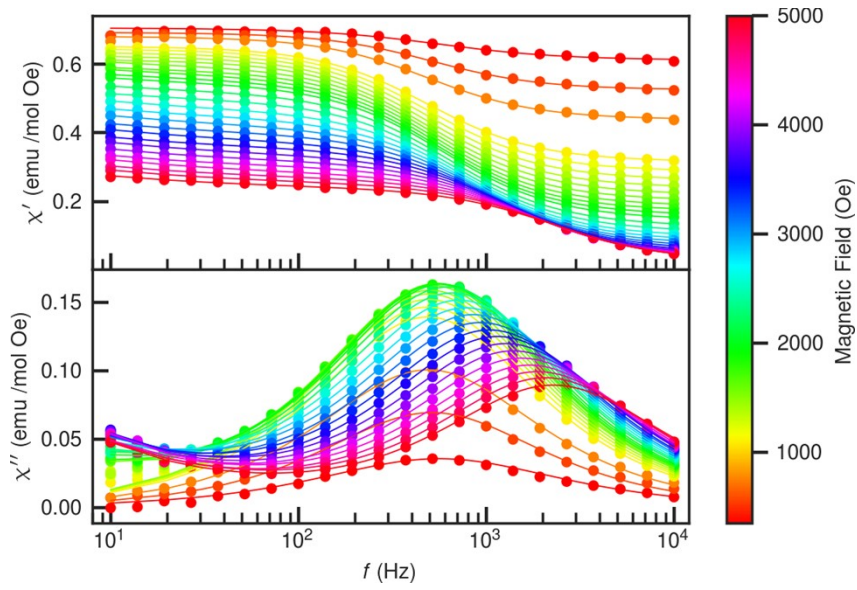

**Fig. S24.** Frequency-dependence of AC susceptibility for CoCP measured at 2.7 K (lines represent the fits made using a generalized Debye model).

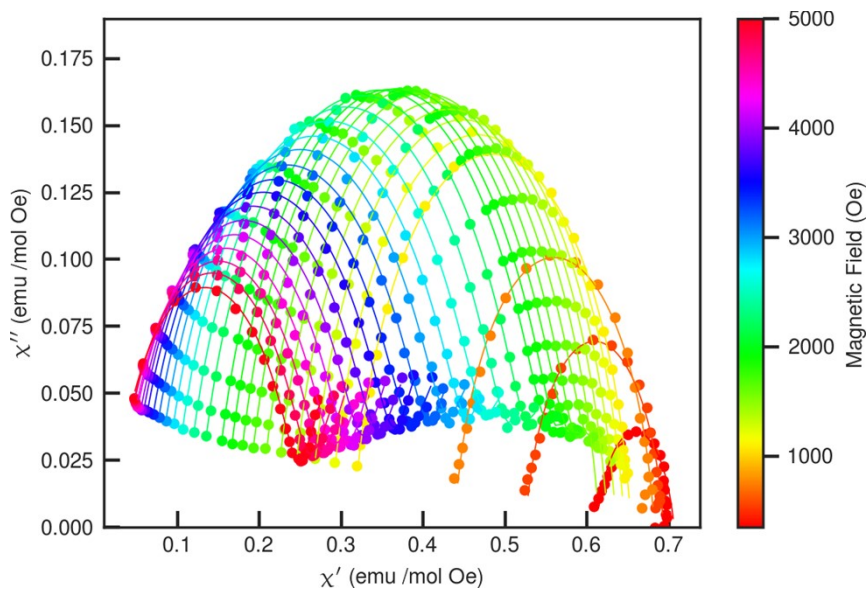

**Fig. S25.** Cole-Cole plot obtained from the frequency-dependence of  $\chi_{AC}$  susceptibility for CoCP (measured at 2.7 K) (lines represent the fits made using a generalized Debye model).



**Table S19.** Selected magnetic data of dynamic magnetic properties and structural correlations of hexacoordinated octahedral complexes.

| Compound                                                                  | $\tau_0$ /s                | $B_{DC}/T$ | $U_{ff}/\text{cm}^{-1}$ | $A/\text{s}^{-1}\text{K}^{-1}$ | $C/\text{s}^{-1}\text{K}^{-1}$ | $n$                | $\tau_{QTM}/\text{s}$ | Effect          | Ref.      |
|---------------------------------------------------------------------------|----------------------------|------------|-------------------------|--------------------------------|--------------------------------|--------------------|-----------------------|-----------------|-----------|
| <b>CoCP</b>                                                               |                            | 0.045      |                         | $1.1(8) \times 10^3$           | 0.9(2)                         | 6.0(1)             | -                     | QTM             | This work |
|                                                                           |                            | 0.1        |                         | $0.9(4) \times 10^3$           | 0.9(2)                         | 6.0(1)             | -                     | Direct          |           |
|                                                                           |                            | 0.3        |                         | $0.5(3) \times 10^2$           | 0.9(2)                         | 6.0(1)             | $3(1) \times 10^3$    | Raman           |           |
| cis-[Co(hfac) <sub>2</sub> (H <sub>2</sub> O) <sub>2</sub> ]              |                            | 0.1        |                         | 7225.7                         | 106.4                          | 4.9                |                       | Direct<br>Raman | 1         |
| [Co(dca) <sub>2</sub> (bim) <sub>4</sub> ]                                | $0.87 \times 10^{-6}$      | 0.25       | 7.74                    |                                |                                |                    |                       | Orbach          | 2         |
| [Co(dca) <sub>2</sub> (bim) <sub>2</sub> ] <sub>n</sub>                   | $1.54 \times 10^{-6}$      | 0.25       | 5.33                    |                                |                                |                    |                       | Orbach          | 2         |
| [Co(dca) <sub>2</sub> (bmim) <sub>2</sub> ] <sub>n</sub>                  | $0.63 \times 10^{-6}$      | 0.25       | 13.81                   |                                |                                |                    |                       | Orbach          | 2         |
| [Co(dca) <sub>2</sub> (atz) <sub>2</sub> ] <sub>n</sub>                   | $1.7 \times 10^{-6}$       | 0.1        | 5.1                     |                                |                                |                    |                       | Orbach          | 3         |
| [Co(ppad) <sub>2</sub> ] <sub>n</sub>                                     | $5.03 \times 10^{-6}$      | 0.2        | 11.37                   |                                |                                |                    |                       | Orbach          | 4         |
| [Co(AcO) <sub>2</sub> (py) <sub>2</sub> (H <sub>2</sub> O) <sub>2</sub> ] | $6.7 \times 10^{-7}$       | 0.15       | 25.0                    |                                |                                |                    | 0.011                 | Orbach<br>QTM   | 5         |
| [Co(pydm) <sub>2</sub> ](dnbz) <sub>2</sub>                               | $2.8(4) \times 10^{-9(a)}$ | 0.2        | 44.1(8) <sup>(a)</sup>  |                                | 72(28) <sup>(a)</sup>          | 2.3 <sup>(a)</sup> |                       | Raman<br>Orbach | 6         |
| (NBu <sub>4</sub> )[Co(piv) <sub>3</sub> ]                                |                            | 0.1        |                         |                                | 0.19                           | 8.3                |                       | Raman           | 7         |

Abbreviations: hfac = hexafluoroacetylacetonate; dca = dicyanamide; bim = 1-benzylimidazole; bmim = 1-benzyl-2-methylimidazole; atz = 2-amino-1,3,5-triazine; ppad = N3-(3-pyridoyl)-3-pyridinecarboxamidrazone; AcO = acetate anion; py = pyridyl; pydm = 2,6-pyridinedimethanol; dnbz = 3,5-dinitrobenzoato(1-); ac = acetato; Melm = 1-methylimidazole; piv = pivalato

## References

- (1) Korchagin, D. V.; Palii, A. V.; Yureva, E. A.; Akimov, A. V.; Misochko, E. Y.; Shilov, G. V.; Talantsev, A. D.; Morgunov, R. B.; Shakin, A. A.; Aldoshin, S. M.; Tsukerblat, B. S. Evidence of Field Induced Slow Magnetic Relaxation in Cis-[Co(Hfac)<sub>2</sub>(H<sub>2</sub>O)<sub>2</sub>] Exhibiting Tri-Axial Anisotropy with a Negative Axial Component. *Dalt. Trans.* **2017**, *46*, 7540–7548.
- (2) Anna Świtlicka-Olszewska, J. P.-G.; Klemens, T.; Machura, B.; Vallejo, J.; Cano, J.; Lloret, F.; Julve, M. Dalton Transactions. *Dalt. Trans.* **2016**, *45* (25), 10181–10193.
- (3) Palion-gazda, J.; Klemens, T.; Machura, B.; Vallejo, J.; Lloret, F.; Julve, M. Single Ion Magnet Behaviour in a Two-Dimensional Network of Dicyanamide-Bridged Cobalt(II) Ions. *Dalt. Trans.* **2015**, *44* (7), 2989–2992.
- (4) Liu, X.; Sun, L.; Zhou, H.; Cen, P.; Jin, X.; Xie, G.; Chen, S.; Hu, Q. Single-Ion-Magnet Behavior in a Two-Dimensional Coordination Polymer Constructed from Co. *Inorg. Chem.* **2015**, *54* (18), 8884–8886.
- (5) Walsh, J. P. S.; Bowling, G.; Ariciu, A.; Jailani, N. F. M.; Chilton, N. F.; Waddell, P. G.; Collison, D.; Tuna, F.; Higham, L. J. Evidence of Slow Magnetic Relaxation in Co(AcO)<sub>2</sub>(Py)<sub>2</sub>(H<sub>2</sub>O)<sub>2</sub>. *Magnetochemistry* **2016**, *2* (2), 23–33.
- (6) Valigura, D.; Rajnák, C.; Moncol, J.; Titiš, J.; Boča, R. A Mononuclear Co(II) Complex Formed from Pyridinedimethanol with Manifold Slow Relaxation Channels. *Dalt. Trans.* **2017**, *46* (33), 10950–10956.
- (7) Chen, S.-Y.; Hui-Hui Cui, Y.-Q. Z.; Wang, Z.; Ouyang, Z.-W.; Chen, L.; Chen, X.-T.; Hong Yan, A.; Xue, Z.-L. Magnetic Anisotropy and Relaxation Behavior of Six-Coordinate Tris(Pivalato)-Co(II) and -Ni(II) Complexes Shu-Yang. *Dalt. Trans.* **2018**, *47* (30), 10162–10171.
